1           **Unbiased Proteomics, Histochemistry, and Mitochondrial DNA Copy Number Reveal**  
2           **Better Mitochondrial Health in Muscle of High Functioning Octogenarians**

3   Ceereena Ubaida-Mohien PhD<sup>1</sup>, Sally Spendiff PhD<sup>2</sup>, Alexey Lyashkov PhD<sup>1</sup>, Ruin Moaddel  
4   PhD<sup>1</sup>, Norah J. MacMillan MD<sup>3</sup>, Marie-Eve Filion MSc<sup>3</sup>, Jose A. Morais MD<sup>3</sup>, Tanja Taivassalo  
5   PhD<sup>4</sup>, Luigi Ferrucci MD PhD<sup>1\*</sup>, Russell T. Hepple PhD<sup>4,5\*</sup>

6   <sup>1</sup>Intramural Research Program, National Institute on Aging, National Institutes of Health,  
7   Baltimore, MD, USA; <sup>2</sup>Children's Hospital of Eastern Ontario Research Institute, 401 Smyth Rd,  
8   Ottawa, CANADA; <sup>3</sup>Research Institute of the McGill University Health Centre, McGill University,  
9   Qc, CANADA; <sup>4</sup>Department of Physical Therapy, University of Florida, FL, USA; <sup>5</sup>Department of  
10   Physiology and Functional Genomics, University of Florida, FL, USA

11   \*Luigi Ferrucci and Russell T. Hepple share senior authorship.

12   Correspondence:

13   **Luigi Ferrucci**

14   Translational Gerontology Branch, National Institute on Aging, National Institutes of Health,  
15   Baltimore, MD. Ph) 410-558-8110, Email: [ferruccilu@grc.nia.nih.gov](mailto:ferruccilu@grc.nia.nih.gov)

16   **Russell T. Hepple**

17   Department of Physical Therapy, University of Florida, 1225 Center Drive, Gainesville, FL, USA  
18   32608. Ph) 352-294-8703, Email: [rthepple@ufl.edu](mailto:rthepple@ufl.edu)

19

20   **DATA AVAILABILITY.** The mass spectrometry proteomics data have been deposited to the  
21   MassIVE with the dataset identifier MSV000086195 (<ftp://MSV000086195@massive.ucsd.edu>),  
22   reviewer user name ( MSV000086195\_reviewer).

23   **Funding:** Funding for this study was provided by operating grants from the Canadian Institutes  
24   of Health Research (MOP 84408 to TT and MOP 125986 to RTH). Supported in part by the  
25   Intramural Research Program of the National Institute on Aging, NIH, Baltimore, MD, United  
26   States.

27   **Conflict of Interest Disclosure.** The authors have no conflicts of interest to disclose.

28   **Ethics Approval and Patient Consent.** Human subjects research was done with prior approval  
29   from the Institutional Review Board of the Faculty of Medicine at McGill University (A08-M66-  
30   12B) and according to the Declaration of Helsinki. All subjects provided written informed  
31   consent.

32

33

34

35

36 **Abstract**

37 Background: Master athletes prove that preserving a high level of physical function up to very  
38 late in life is possible, but the mechanisms responsible for their high function remain unclear.

39 Methods: We performed muscle biopsies in 15 octogenarian world class track and field masters  
40 athletes (MA) and 14 non-athlete age/sex-matched controls (NA) to provide insights into  
41 mechanisms for preserving function in advanced age. Muscle samples were assessed for  
42 respiratory compromised fibers, mtDNA copy number, and proteomics by liquid-chromatography  
43 mass spectrometry.

44 Results: Most of the ~800 differentially represented proteins in MA versus NA pertained to  
45 mitochondria structure/function such as electron transport capacity (ETC), cristae formation,  
46 mitochondrial biogenesis, and mtDNA-encoded proteins. In contrast, proteins from the  
47 spliceosome complex and nuclear pore were downregulated in MA. Consistent with proteomics  
48 data, MA had fewer respiratory compromised fibers, higher mtDNA copy number, and an  
49 increased protein ratio of the cristae-bound ETC subunits relative to the outer mitochondrial  
50 membrane protein voltage dependent anion channel. There was a substantial overlap of  
51 proteins overrepresented in MA versus NA with proteins that decline with aging and which are  
52 higher in physically active than sedentary individuals. However, we also found 176 proteins  
53 related to mitochondria that are uniquely differentially expressed in MA.

54 Discussion: We conclude that high function in advanced age is associated with preserving  
55 mitochondrial structure/function proteins, with under-representation of proteins involved in the  
56 spliceosome and nuclear pore complex. Whereas many of these differences in MA appear  
57 related to their physical activity habits, others may reflect unique biological (e.g., gene,  
58 environment) mechanisms that preserve muscle integrity and function with aging.

59 **Keywords:** Master Athletes, non athletes, proteomics, skeletal muscle, mitochondria,  
60 spliceosome, aging, mass spectrometry, nuclear pore, octogenarians, physical activity, exercise

61

62

## 63 1 INTRODUCTION

64 The aging process is associated with profound changes in body composition that includes a  
65 substantial decline of muscle mass and a disproportionately more severe decline in strength  
66 (Goodpaster *et al.*, 2006). Such decline in skeletal muscle mass and strength starts between the  
67 third and the fourth decades of life both in men and women, substantially accelerates after the  
68 age of 75 years, and in some individuals becomes so severe as to cause mobility loss and frailty  
69 (Cawthon *et al.*, 2019). However, there is clear evidence that such “usual” decline of strength  
70 and function is not an inescapable consequence of aging. For example, some athletes retain  
71 remarkably high physical performance in their eighties and nineties and there have been  
72 sporadic mentions of centenarians who compete in marathons  
73 (<https://www.runnersworld.com/runners-stories/a20812407/whos-the-fastest-centenarian/>). The  
74 study of these extreme examples provides a unique opportunity to identify mechanisms that in  
75 most individuals determine a decline of muscle health with aging, but which are counteracted in  
76 highly functioning individuals. For example, we have previously shown highly functioning  
77 octogenarian track and field athletes better maintain the number and transmission stability of  
78 motor units (Power *et al.*, 2016) and exhibit high muscle fiber reinnervation capacity (Sonjak *et al.*  
79 *et al.*, 2019) compared to healthy octogenarian non-athletes and pre-frail/frail octogenarians,  
80 respectively.

81 Using a discovery, unbiased proteomics approach on skeletal muscle biopsies collected in very  
82 healthy individuals aged 20 to 87 years, we previously found that older age was associated with  
83 underrepresentation of mitochondrial proteins, especially those associated with oxidative  
84 phosphorylation and energy metabolism (Ubaida-Mohien *et al.*, 2019b). Besides, independent  
85 of age, 75% of proteins overrepresented in persons who were more physically active in their  
86 daily life were mitochondrial proteins across the different sub-localization or function (Ubaida-  
87 Mohien *et al.*, 2019a). These data strongly suggest that maintaining mitochondrial function is a  
88 key to healthy muscle with aging. However, because both mitochondrial function and physical  
89 activity level both decline with aging even in healthy individuals, discriminating their independent  
90 effects on muscle health remains problematic. The study of muscle biopsies in highly trained,  
91 older individuals compared with age-matched controls should overcome, at least in part, this  
92 limitation.

93 In this study, we used data and biological specimens collected in 15 track and field masters  
94 athletes (MA) aged 75 to 93 y (8 females), eight of whom were world record holders in their age

95 group for at least one event at the time of study, with the remaining individuals ranked in the top  
96 5 world-wide for their respective age and discipline. These individuals are representative of the  
97 extreme tail of the distribution of physical fitness in their age group. These master athletes were  
98 compared with 14 age- and sex-matched non-athletes recruited from the greater Montreal area  
99 (NA; 6 females) to represent healthy independent octogenarian individuals. We compared in  
100 these two groups cardiopulmonary fitness (cycle test), isokinetic knee extensor strength, and  
101 lower extremity function (time to walk 4m fast, chair stands, stand-up and go fast, balance time).  
102 In addition, we used magnetic resonance imaging of the thigh to determine muscle cross-  
103 sectional area. We performed in-depth skeletal muscle phenotyping using muscle biopsies  
104 collected by Bergstrom needle from the vastus lateralis for an unbiased proteomics analyses,  
105 histochemical characterization of proteins involved in oxidative phosphorylation (oxphos) and  
106 assessment of mitochondrial DNA (mtDNA) copy number by real time polymerase chain  
107 reaction (qPCR). High physical function in octogenarians was associated with  
108 overrepresentation of the mitochondrial proteome, underrepresentation of mRNA processing  
109 and pre-mRNA splicing, fewer oxphos compromised muscle fibers and higher mtDNA copy  
110 number, implicating mitochondrial health in skeletal muscle as a key feature facilitating high  
111 physical function in advanced age.

## 112 2 RESULTS

### 113 2.1 Superior clinical function in master athletes (MA) versus non-athlete controls (NA)

114 The general characteristics of the 15 MA and 14 NA participants are summarized in Table 1.

115 **Table 1. Characteristics of NA and MA.**

|                      |        | NA (n=14)   | MA (n=15)   | P-value |
|----------------------|--------|-------------|-------------|---------|
| <b>Age, Y</b>        |        | 80.9 ± 4.5  | 80.1 ± 4.8  |         |
| <b>Sex</b>           | Male   | 7           | 7           |         |
|                      | Female | 7           | 8           |         |
| <b>Body Mass, kg</b> |        | 72.1 ± 11.4 | 62.2 ± 10.7 | 0.04    |
| <b>Body Fat, %</b>   |        | 36.0 ± 6.6  | 21.9 ± 5.0  | <0.00   |

116 Values are means ± SD.

117 The athletes could generally be subdivided into two groups based upon their preferred  
118 competition events. Sprint/Power athletes comprised individuals who competed in multi-sport  
119 jumping, throwing, and sprinting events; and individuals who competed in sprint running.  
120 Endurance athletes competed in track running and road running distances from 400 m to a full  
121 marathon (26.2 miles). An overview of the training and competition history of the MA group is in  
122 Table 2. With respect to their training habits, it should be noted that each subject commented  
123 that the training load (particularly intensity) varied not only within a competition season but also  
124 within a 5 y age bracket (e.g., 75 to 79 y, 80-84 y, etc.). Training typically increased in the  
125 months approaching a birthday that would move them up to the next age category to take  
126 advantage of being the “youngest” in their new age bracket at international competitions. In  
127 addition, regardless of the preferred competition events, all athletes noted a very mixed training  
128 regimen consisting of varying amounts of running, cycling, walking, stretching, yoga and  
129 strength training. The rationale for selecting athletes from a broad array of athletics disciplines  
130 was that we were not interested in the effects of a specific type of exercise training *per se* (e.g.,  
131 endurance or strength training), but rather in identifying individuals with exceptional physical  
132 capabilities regardless of their training. Consistent with this rationale, MA participants had  
133 superior function during the assessment of  $VO_{2max}$ , peak cycle work rate, time to walk 4 m fast,  
134 chair stands, stand up and go, and balance time versus NA (Figure 1 a-f), confirming that they  
135 represent high functioning octogenarians.

136 **Table 2. Training and competition history of octogenarian MA.**

|                      | n       | Age, Y     | Training per wk (h) | Years competing |
|----------------------|---------|------------|---------------------|-----------------|
| <b>Sprint, Power</b> | 8 (4 F) | 79.9 ± 6.1 | 16 ± 3              | 16.6 ± 6.2      |
| <b>Endurance</b>     | 7 (4 F) | 80.3 ± 3.4 | 14 ± 5              | 26.6 ± 9.4      |

Values are means ± SD.

137

Figure 1

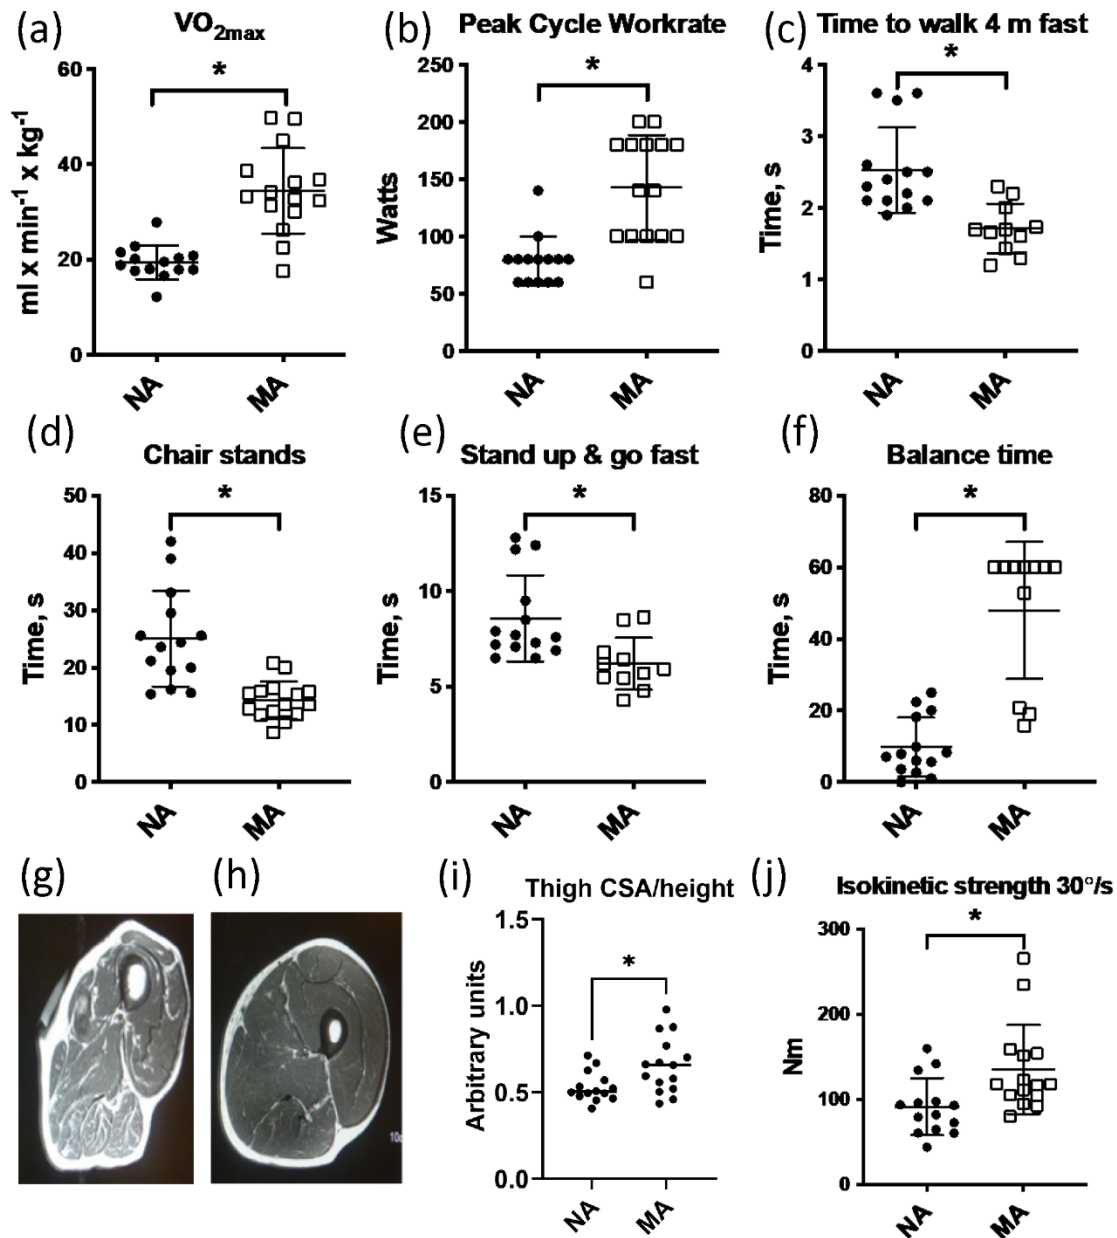

138

## 139 2.2 Greater preservation of muscle mass in octogenarian MA

140 All MA and NA participants underwent an MRI scan of the mid-thigh region at the same level as  
141 the muscle biopsy. Thigh cross sectional image of participant (Figure 1g-h) and MRI cross  
142 sectional image of participants were analyzed (Figure 1i). The area of the vastus lateralis  
143 muscle (biopsied muscle) was determined for both legs. The estimated muscle cross-sectional  
144 area (CSA) of the thigh (normalized by height) was significantly higher in MAs than NA (Figure  
145 1j). Maximal isokinetic strength during knee extension was significantly greater in MA than NA.

146 To consider the myosin genes that encode muscle mass maintenance and skeletal muscle  
147 contraction, we performed a fiber type proportion and fiber size type analysis (type I, type IIa,  
148 type IIx, and hybrid) by immunolabeling for the major myosin heavy chain isoforms in MA and  
149 NA. This analysis shows very subtle differences that did not reach statistical significance  
150 between MA and NA groups (Figure 1-figure supplement 1, panel A). This analysis is  
151 corroborated by our proteomics data which also shows very subtle differences in the expression  
152 of MYH7 (type I), MYH2 (type IIa), MYH1 (type 2x), and negligible expression of MYH4 (type  
153 IIb) as expected (Figure 1-figure supplement 1, panel B). Indeed, after accounting for the false  
154 discovery rate, there were no significant differences in myosin heavy chains between groups.  
155 Further to this, there were no significant differences in fiber size by type or in the type I to type II  
156 cross-sectional area ratio between MA and NA (Figure 1-figure supplement 1, panels C and D,  
157 respectively).

### 158 **2.3 Quantitative proteomics reveals temporal proteome differences between MA and NA**

159 To understand how skeletal muscle protein composition differs between MA and NA  
160 octogenarians, we performed a discovery proteomic analysis of muscle biopsies using LC-MS.  
161 We used a 10-plex Tandem Mass Tag (TMT) labeling approach that allows quantification and  
162 direct comparison between samples. Analyzing 28 participants, we were able to quantify 6,176  
163 proteins (Figure 2a, Figure 2-figure supplement 1). Of these, 4,178 proteins (68%) were  
164 quantifiable across three TMT batches (present in all donors), and 1,998 proteins (18%) were  
165 quantifiable in only one TMT batch (present in at least 10 donors). The quantitative protein  
166 expression between the TMT batches (Figure 2b) was mostly similar. The list of all proteins  
167 quantified from the MA and NA skeletal muscle are reported in Table S1. The Principal Least  
168 Square (PLS) dimensionality reduction method used to stratify proteome distribution between  
169 MA and NA from 24 donors (Figure 2c) reveals a clear separation between the groups along the  
170 PC1 (11.6%) and PC2 (16.7%) axes and PC3 (11.1%) axes.

171 Of all the 6,176 proteins quantified, 880 were differentially represented between MA and NA  
172 (Student's *t*-test,  $p < 0.05$ , FC  $> 1.02$  for overrepresented proteins and  $< 0.9$  for underrepresented  
173 proteins), and of these, 544 proteins were overrepresented and 336 proteins were  
174 underrepresented in MA compared to NA (Figure 2d, Table S2a-b). Uniprot cellular localization  
175 coverage for these divergently represented proteins is shown in Figure 2e. Of note, 42% of the  
176 total 880 significantly altered proteins in octogenarians were mitochondrial proteome, and most  
177 of the differentially represented proteins relate to mitochondrial structure or oxidative

178 phosphorylation. This ample coverage of the mitochondrial proteome enables us to explore the  
 179 modulating role of mitochondria in high functioning octogenarians' muscle metabolism.

**Figure 2**

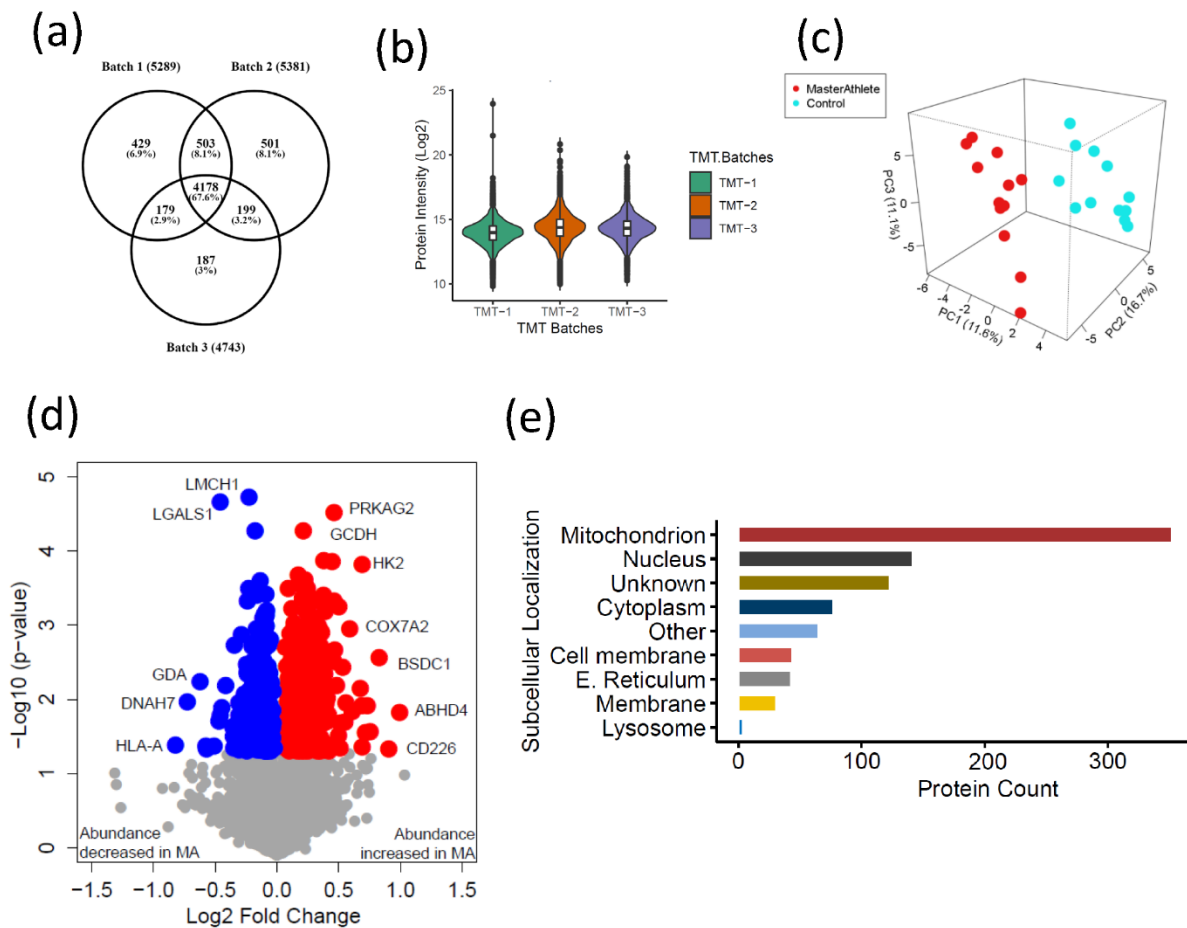

180

## 181 2.4 Mitochondrial protein enrichment in octogenarian MA

182 The 369 mitochondrial proteins overrepresented in MA include 117 mitochondrion inner  
 183 membrane proteins, 21 outer membrane proteins, 18 matrix proteins, 10 inter-membrane space  
 184 proteins, and 5 outer membrane proteins. The abundance of all mitochondrion proteins is higher  
 185 in MA, except 8 proteins (Figure 3a). Enrichment analysis with the whole human genome as a  
 186 statistical background revealed oxidoreductase activity, electron transport activity, and cofactor  
 187 binding as the top significantly enriched pathways in MA after FDR correction and fisher exact  
 188 test cut-off at  $p < 0.01$  (Figure 3b). Specifically, 110 proteins associated with TCA and respiratory  
 189 electron transport, 71 proteins from oxidative phosphorylation and 43 protein constituents of



190 complex I, 3 in complex II (SDHA, SDHB, SDHC), 8 in complex III, 13 in complex IV, and 10 in  
191 complex V were significantly more abundant in MA (Figure 3c).

192 The cytoplasmic and nuclear SIRT3 and SIRT5 mitochondrial sirtuins, which are master regulators of mitochondrial biology,  
193 SIRT3 and SIRT5 mitochondrial sirtuins, which are master regulators of mitochondrial biology,  
194 including energy production, metabolism, apoptosis, and intracellular signaling. Both SIRT3 and  
195 SIRT5 proteins were 1.2-fold more abundant in MA than NA ( $p < 0.01$ ) (Figure 3d). Of note, the  
196 overrepresentations of SIRT3 in MA were consistent with higher deacetylation of long-chain  
197 acyl-CoA dehydrogenase (LCAD) in MA (FC 1.14 and  $p = 0.007$ ), which suggest upregulation of  
198 lipid catabolism and fatty acid oxidation pathways. The deacetylase activity of SIRT3 improves  
199 mitochondrial function by the deacetylation of mitochondrial complex I protein NADH ubiquinone  
200 oxidoreductase subunit A9 (NDUFA9) (Ahn *et al.*, 2008) and succinate dehydrogenase from  
201 complex II (SDH) (Cimen *et al.*, 2010). SIRT3 also deacetylates the mitochondrial permeability  
202 transition-regulating protein, cyclophilin D, to reduce likelihood of opening of the mitochondrial  
203 permeability transition pore (Hafner *et al.*, 2010). Finally, SIRT3 deacetylates lysine residues on  
204 SOD2 to promote its antioxidant activity and thereby reduce the level of ROS released outside  
205 mitochondria. Whilst we would expect this deacetylation to increase SOD2 activity independent  
206 of changes in SOD2 content, in our study SOD2 protein (FC=1.17,  $p = 0.037$ ) was also more  
207 highly expressed in MA. Comparatively, less is known about SIRT5 than SIRT3, but it has been  
208 reported that SIRT5 physically interacts with cytochrome c (CYCS) and CYCS abundance was  
209 1.3-fold higher in MA (Figure 3-figure supplement 1, panel a).

**Figure 3**

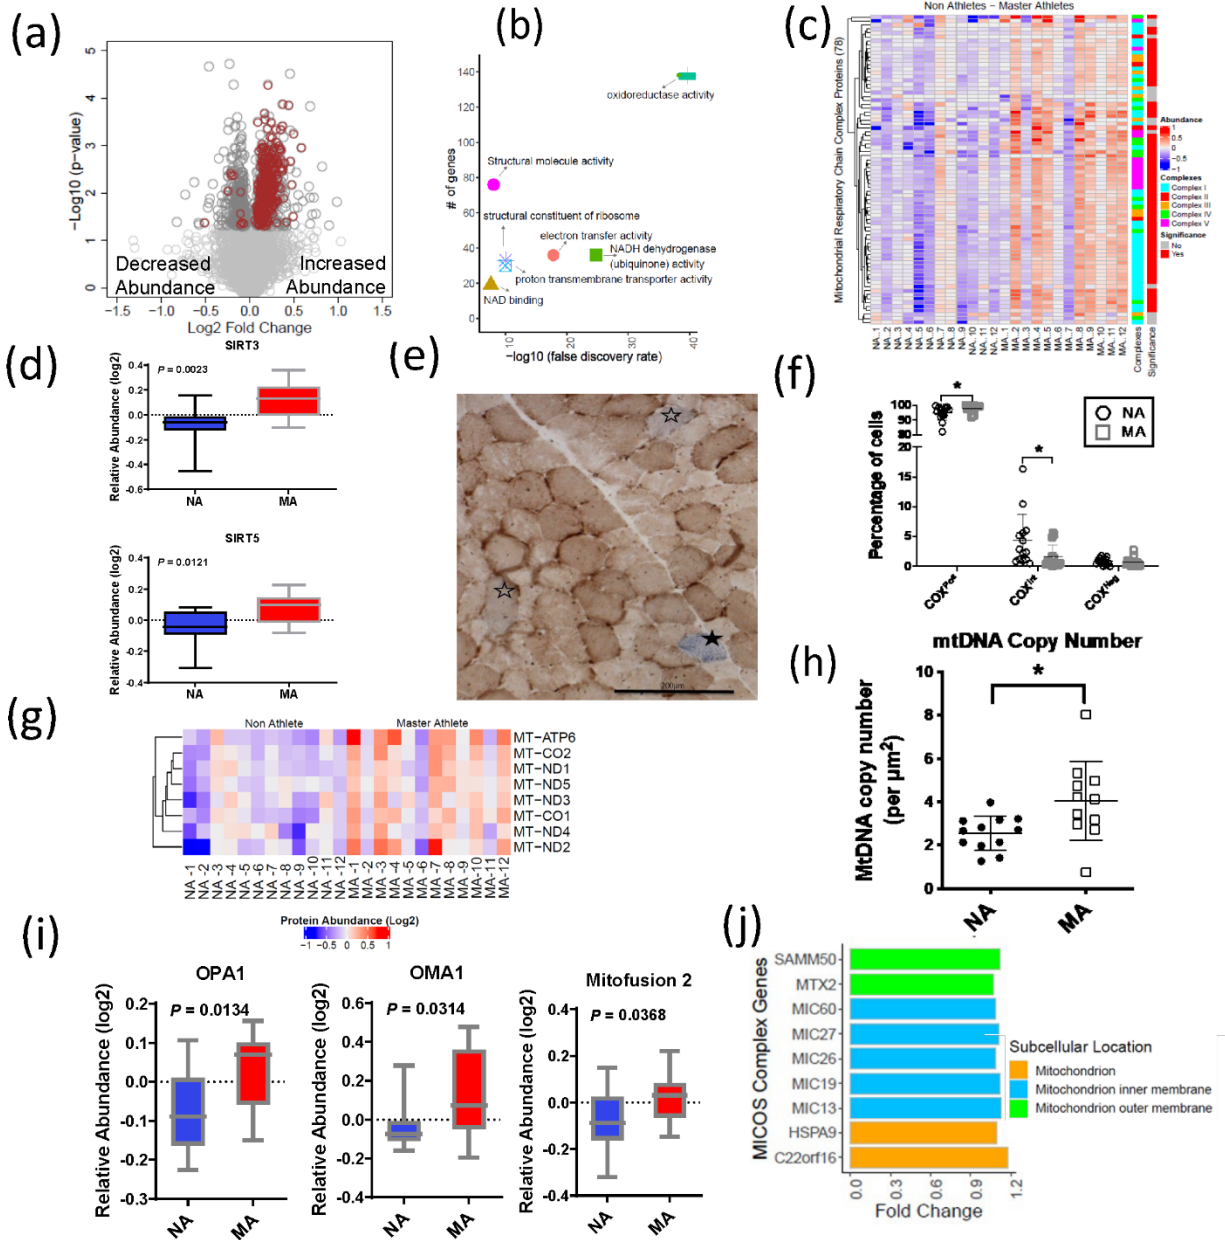

210

211 While our proteomics analyses identified a globally higher abundance of OXPHOS proteins  
 212 (Figure 3c), markers of mitochondrial content specifically assessed by Western blot were not  
 213 univocally associated with MA status. For example, VDAC was not different between groups,  
 214 whereas citrate synthase by proteomics was elevated in MA (Figure 3-figure supplement 1,  
 215 panel b). Furthermore, we observed a significant effect ( $p=0.046$ ) for a higher abundance of  
 216 OXPHOS complexes relative to VDAC in MA when analyzed by Western blot, consistent with  
 217 the higher abundance of OXPHOS complexes by proteomics in MA (Figure 3-figure supplement

218 1, panel c) (uncut blots for VDAC and Oxphos subunits are shown in (Figure 3-figure  
219 supplement 2 -source data 1). Histochemical analysis to quantify muscle fibers with  
220 compromised respiratory function revealed a significantly higher abundance of healthy COXPos  
221 fibers ( $p=0.0291$ ) and fewer respiratory chain compromised (COXInt) myofibers ( $p=0.0448$ ) in  
222 MA (Figure 3e-f). Thus, the proteomics data is consistent with histochemical phenotypic data  
223 showing better maintenance of respiratory competent muscle fibers (COXPos fibers) in MA and  
224 an increased abundance of ETC subunits ratio relative to VDAC. This latter observation could  
225 suggest greater cristae surface area relative to mitochondrial volume, or differences in the  
226 clearance of mitochondrial membranes.

227 In contrast to the general higher abundance of mitochondrial proteins noted above, 8  
228 mitochondrial proteins had a lower abundance in MA, which were: NADH-cytochrome b5  
229 reductase 3 (CYB5R3), Phosphatidate cytidyltransferase 2 (CDS2), Long-chain-fatty-acid--  
230 CoA ligase 3 (ACSL3), Dimethylarginine dimethylaminohydrolase 1 (DDAH1), WD repeat-  
231 containing protein 26 (WDR26), Serine/threonine-protein phosphatase PGAM5 (PGAM5), SHC-  
232 transforming protein 1 (SHC1), and StAR-related lipid transfer protein 7 (STARD7).

## 233 **2.5 mtDNA proteins enrichment and maintenance of cristae architecture in octogenarian** 234 **MA**

235 Previous studies suggest respiratory chain defects in skeletal muscle may result from high  
236 levels of mtDNA mutations (Bua *et al.*, 2006b; Murphy *et al.*, 2012a) and/or mtDNA depletion  
237 (Muller-Hocker *et al.*, 1993; Mueller *et al.*, 2012). To address this issue in our subjects, we  
238 specifically explored mitochondrial proteins in our proteomics dataset encoded in mtDNA. Of the  
239 known 13 mtDNA proteins, 8 were quantified in our data, and all of them were significantly more  
240 abundant in MA than in NA ( $p<0.05$ ) (Figure 3g). The proteomics data were consistent with  
241 findings that absolute mtDNA copy number evaluated using a quantitative method was higher in  
242 MA than in NA (Figure 3h) and indicated parallel protection of mtDNA copies and mtDNA-  
243 encoded proteins in MA. Further, the observation of a lower abundance of respiratory  
244 compromised fibers (defined as low or absent complex IV staining in COX-SDH double-stained  
245 muscle cross-sections) (Figure. 3e,f) in MA versus NA is consistent with a lower burden of  
246 mtDNA mutation in highly functioning MA octogenarians compared to NA.

247 Consistent with the higher protein levels of many mitochondrial proteins in MA, our results show  
248 that 38 proteins from 28S and 39S mitoribosomal proteins were significantly more abundant in  
249 MA, suggesting an increased mitochondrial protein synthesis. Conversely, cytoplasmic

250 ribosomal protein (RPS2, RPLP0) abundance was lower in MA (Figure 3-figure supplement 1,  
251 panel d).

252 Mitochondrial morphology is regulated by proteins that modulate fission (e.g., DRP1) and fusion  
253 (e.g., OPA1, MFN 1 & 2). For example, OPA1 induces mitochondrial inner membrane fusion  
254 (Mishra *et al.*, 2014) to promote cristae tightness, increase the activity of respiratory enzymes  
255 and enhance the efficiency of mitochondrial respiration (Cogliati *et al.*, 2013). Interestingly,  
256 OPA1, MFN1, and DRP1 were overrepresented in MA (Figure 3i), although DRP1 fold elevation  
257 in MA donors was not statistically significant. The mitochondrial contact site and cristae  
258 organizing system (MICOS) complex are crucial for maintaining cristae architecture, and  
259 knockdown of MICOS components leads to mitochondria with altered cristae morphology and  
260 compromised oxidative phosphorylation. In this study, 15 out of 17 Uniprot annotated MICOS  
261 complex proteins were quantified, and 9 of them were significantly more abundant in MA (Figure  
262 3j). For example, the mitochondrial inner membrane protein mitofilin (MIC60), which controls  
263 cristae morphology and is thus indispensable for normal mitochondrial function (John *et al.*,  
264 2005), was 1.2 times fold more abundant in MA donors. Of note, we have previously reported a  
265 decrease in the abundance of these 9 proteins with healthy aging (Ubaida-Mohien *et al.*,  
266 2019b).

267 A complex array of dynamic protein interactions (Sam50, Metaxin, and the inner membrane  
268 localized MICOS) at cristae junctions that form the Mitochondrial Intermembrane Space  
269 Bridging (MIB) complex was reported recently (Huynen *et al.*, 2016). The outer mitochondrial  
270 membrane protein Metaxin2 (MTX2), which was significantly more abundant in MA (Figure 3-  
271 figure supplement 3, panel a), interacts with MICOS complex and MTX3, which are the part of  
272 MIB complex (Huynen *et al.*, 2016). Metaxins, together with Sam50, are also important for the  
273 stability of respiratory complexes (Ott *et al.*, 2012). A general translocase mediates the import of  
274 nuclear-encoded mitochondrial preproteins in the outer membrane, the TOM complex, and by  
275 two distinct translocases in the mitochondrial inner membrane, the TIM23 complex, and the  
276 TIM22 complex. The average expression of two TOM complex proteins (TOMM22 and  
277 TOMM40) and ten TIM complex proteins (TIM10, TIM13, TIM14, TIM16, TIM22, TIM23, TIM29,  
278 TIM44, and TIM50) were found to be more abundant in MA (Figure 3-figure supplement 3, panel  
279 b).

## 280 **2.6 Autophagy and proteostasis pathway proteins in octogenarian MA**

281 Skeletal muscle mass is influenced by the proteolytic process of protein turnover and  
282 degradation. The major regulatory process of the proteolytic system is chaperone mediated  
283 autophagy by lysosomes, and the ubiquitin proteasome pathway. There were 267 proteins from  
284 these pathways quantified, and 47 proteins were significantly associated with MA ( $p < 0.05$ , 17  
285 underrepresented in MA). The proteins were categorized as Autophagy, Autophagy-Lysosome,  
286 Chaperones, Proteasome, and other proteostasis cluster proteins (Figure 3-figure supplement  
287 4). Proteasome proteins PSMB1, PSMA2, small heat shock protein HSPB8, DNAJ proteins like  
288 DNAJB4, DNAJC3 etc., were lower in MA. Activation/inhibition of autophagy – such as V-type  
289 proton ATPase 116 kDa subunit isoform 1 (ATP6V0A1), Heat shock 70 proteins like HSPA2 and  
290 HSPA1A proteins, were also lower in MA. A lower ATP6V0A1 was reported previously in highly  
291 active aging healthy donors (Ubaida-Mohien *et al.*, 2019a). In contrast, many mitochondrion  
292 localized proteostasis proteins like HSCB, MRPL18, TIMM9, HSPE1, HSPA9 etc., were higher  
293 in abundance in MA. PRKAG2, 5'-AMP-activated protein kinase subunit gamma-2, a component  
294 of AMP kinase main energy-sensor protein kinase that responds to changes in the cellular  
295 AMP:ATP ratio and regulates the balance between ATP production and consumption, was one  
296 of the highly expressed proteins ( $\log_2FC$  1.3) in MA octogenarians, suggesting a tightly  
297 monitored balance between energy production and utilization (Mounier *et al.*, 2015).

298

## 299 **2.7 Impact of nuclear pore membrane proteins and transport proteins in octogenarian MA**

300 Nuclear pore complexes (NPCs) facilitate and regulate the transport of different  
301 macromolecules across the nuclear envelope, allowing bilateral exchanges between the nuclear  
302 and the cytoplasmic environment (Strambio-De-Castillia *et al.*, 2010; Wentz & Rout, 2010). 25  
303 nuclear pore proteins were quantified, all less expressed in MA than in NA, and for 12 of them,  
304 the difference was statistically significant ( $p < 0.05$ ) (Figure 3-figure supplement 5, panel a).  
305 Nucleopore cytoplasmic filaments like NUP358, NUP98 and NUP88, and adaptor NUPs like  
306 NUP98/96 were less abundant in MA. Tpr, the central architectural element of nuclear pore  
307 formation, Nup93, which is critical for nuclear permeability, were also less abundant in MA  
308 (Figure 3-figure supplement 5, panel b). The lower abundance of proteins of the nuclear pore in  
309 MA was unexpected and should be further explored in future studies.

## 310 **2.8 Spliceosome pathway proteins are under-represented in octogenarian MA**

311 Alternative splicing produces protein variants by combining information from different exon  
312 sequences in the same genes. Aging is associated with the emergence of different splicing  
313 variants of the same genes (Harries *et al.*, 2011; Holly *et al.*, 2013; Bhadra *et al.*, 2020).  
314 However, it remains unknown whether these changes in the human proteome are part of the  
315 aging process or represent resilience strategies to cope with the damage accumulation and  
316 functional decline associated with aging (Deschenes & Chabot, 2017). Previous studies have  
317 shown that alternative splicing is particularly abundant in skeletal muscle, and we have shown  
318 that proteins that regulate alternative splicing are significantly overrepresented in skeletal  
319 muscle tissue from older compared to younger healthy individuals (Ubaida-Mohien *et al.*,  
320 2019b). Interestingly, after accounting for age and other covariates, being physically active in  
321 daily life was associated with a lower representation of spliceosome proteins in skeletal muscle  
322 (Ubaida-Mohien *et al.*, 2019a). Also, one of the strongest signals in this analysis was a lower  
323 representation of proteins related to mRNA metabolic process, mRNA splicing, and mRNA  
324 processing in MA. In particular, we were able to quantify 132 spliceosome proteins, 102 proteins  
325 were less abundant in MA, and 22 proteins were significantly less abundant in MA ( $p < 0.05$ )  
326 (Figure 4a). The functional characteristics of the spliceosomal proteins were shown in (Figure  
327 4b). Of note, TRA2A, an RNA-binding splicing factor protein that modulates splicing events and  
328 translation, was among the most significantly affected proteins ( $p = 0.0004$ ) in this category with  
329 the greatest fold-difference from NA (Figure 4c). Functional analysis of TRA2A suggests a  
330 highly interconnected functional interaction network with two major pathway proteins: mRNA  
331 splicing major pathway (red), and mRNA splicing minor pathway (blue) proteins (Figure 4d).  
332 Despite not having a direct interaction within this network, the DCPS protein has a role in the  
333 first intron splicing of pre-mRNAs (Figure 4d). Taken together, the lower representation of  
334 spliceosome proteins that regulate alternative mRNA splicing in MA are consistent with the  
335 effects of physical activity in our previous study and suggest that alternative splicing is part of a  
336 resilience response in the face of lower mitochondria function. Such a resilience response is not  
337 required in MA because of high mitochondrial function maintenance despite old age (Ubaida-  
338 Mohien *et al.*, 2019a). This hypothesis is consistent with previous data showing that after  
339 adjusting for age and physical activity, better skeletal muscle oxidative capacity assessed by  
340  $^{31}\text{P}$ -MR spectroscopy is associated with overrepresentation of splicing machinery and pre-RNA  
341 processing proteins (Adelnia *et al.*, 2020).

**Figure 4**

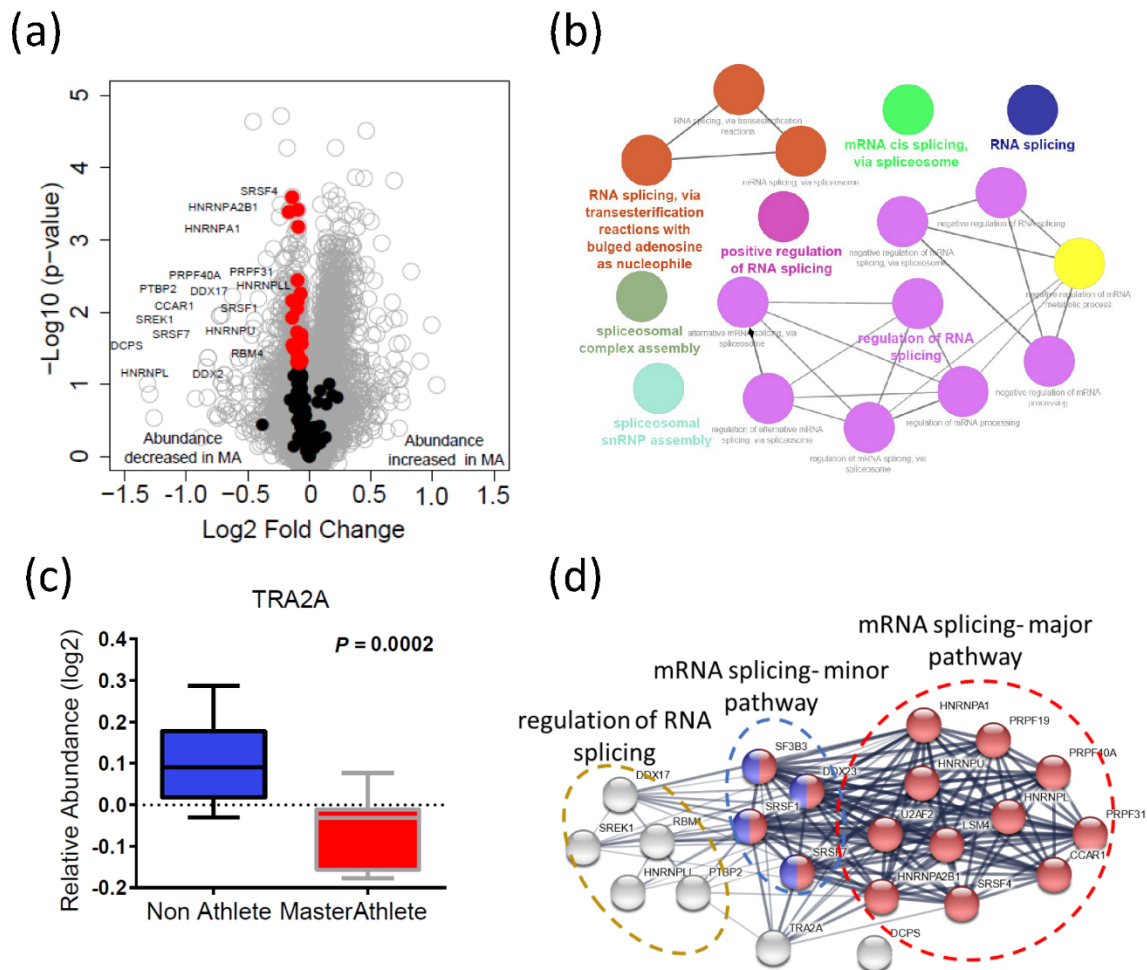

342

343 **2.9 Modulation of mitochondrion and splicing machinery with aging, physical activity,**  
 344 **and exercise**

345 To further explore the hypothesis that alternative splicing is part of a compensatory adaptation  
 346 to impaired mitochondrial function, we combined the results of this study with the skeletal  
 347 muscle proteomic data in 58 healthy participants collected in the GESTALT study (Figure 5–  
 348 figure supplement 1) (Ubaida-Mohien *et al.*, 2019a; Ubaida-Mohien *et al.*, 2019b). Notably, we  
 349 searched for proteins that were underrepresented with age (GESTALT, Age-) and  
 350 overrepresented with both higher physical activity (GESTALT, PA+) and in Master Athletes  
 351 (MA+) compared to age-matched controls (Figure 5). Enrichment analysis of proteins at the  
 352 intersection showed 50 proteins enriched at all three shared interceptions, including proteins  
 353 representing mitochondrial biogenesis, TCA cycle and respiratory electron transport, MICOS  
 354 complex, and cristae formation (Figure 5).

Figure 5

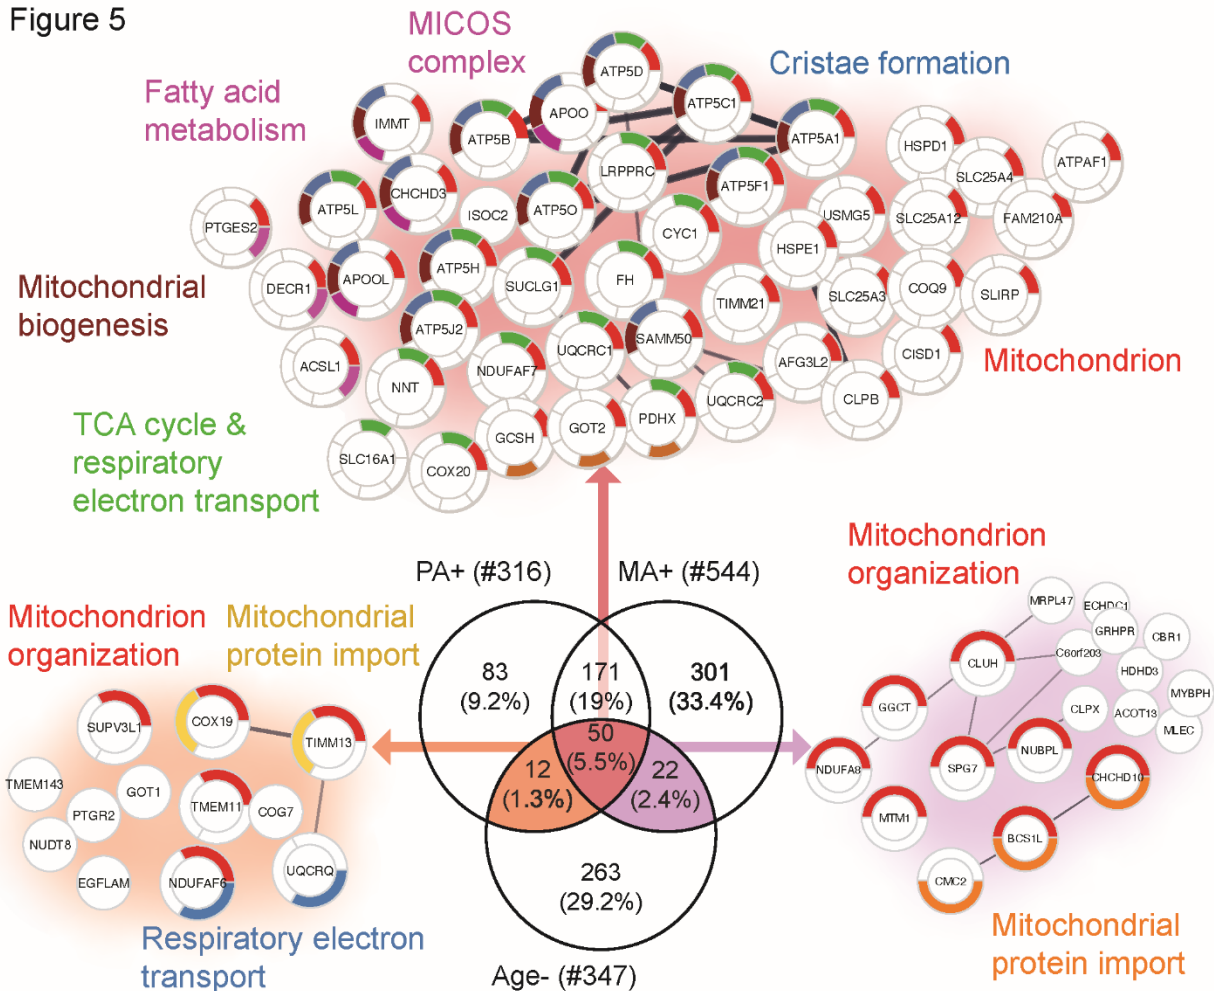

355

356 Although there was considerable overlap between proteins overrepresented with higher physical  
 357 activity in the GESTALT study and proteins overrepresented in MA, a large group of proteins  
 358 related to mitochondrial protein import and mitochondrion organization were specific to the MA  
 359 group (not associated with physical activity *per se*). This suggests that although many of the  
 360 proteins which are more abundant in MA versus NA can be attributed to MAs physical activity  
 361 habits, this does not account for all of the differences observed. Specifically, out of 301 unique  
 362 MA+ proteins, a subset of proteins: mitochondrial translation (36 proteins), mitochondrial inner  
 363 membrane (75 proteins), mitochondrial matrix proteins (65 proteins) appear unrelated to  
 364 physical activity and may reflect unique biology in our MA group (Figure 6).

365

366



367 **Figure 6**

368

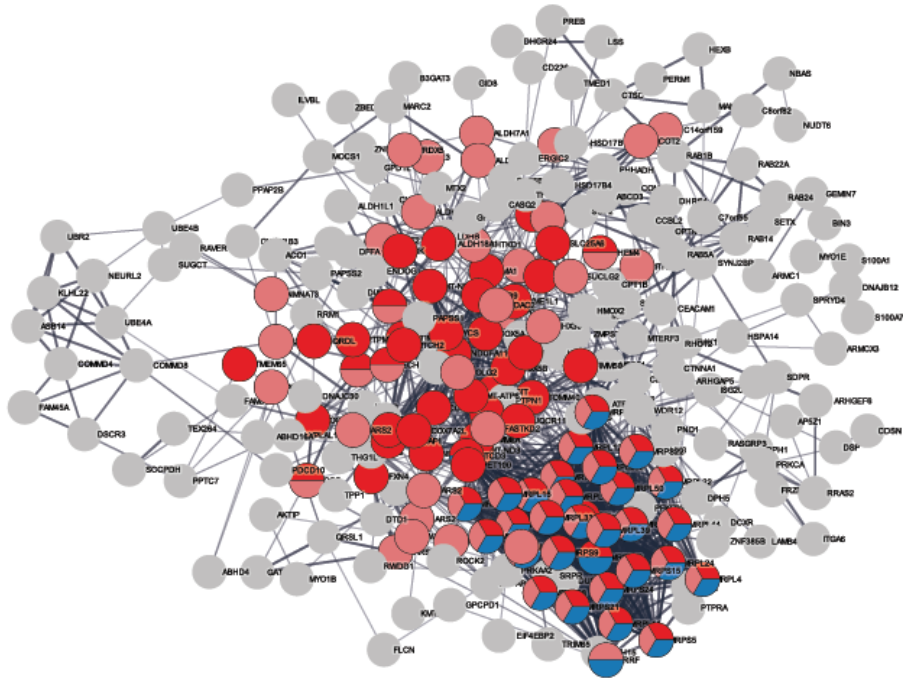

379 In the next analysis, we considered the proteins which were overrepresented with age  
380 (GESTALT, Age+) and underrepresented with both higher physical activity (GESTALT, PA-) and  
381 in Master Athletes (MA-) compared to age-matched controls (Figure 7 panel a). Interestingly, we  
382 found 40 proteins in all three meaningful interceptions (Age+/PA-/MA-; Age+/PA-; Age+MA-),  
383 and these involved mRNA splicing, capped introns containing pre-RNA, sarcolemma, regulation  
384 of glucokinase, spliceosome, and metabolism of RNA (Figure 7). The other notable category  
385 pathway differentially represented in Age+ and MA- were the NLRP inflammasome pathway,  
386 indicating the inflammasome proteins that increase with aging are antagonized in MA subjects.  
387 Although more proteins were affected in PA than MA versus NA, several proteins were affected  
388 in MA versus NA that were not affected by PA, supporting the idea that there are likely factors  
389 beyond physical activity involved in protecting the MA group's muscle proteome. Specifically,  
390 162 MA-exclusive proteins were under-represented in MA vs NA and reflect the unique  
391 physiology of MA participants. Enrichment analysis identified proteins regulating nuclear pore  
392 organization (NUP133, NUP153, NUP54), heterochromatin organization (HP1BP3, H3F3B and  
393 HMGA1) and telomere (HMBOX1, PURA, TERF2IP), mRNA and splicing process, and  
394 contractile/sarcomere fiber proteins (Figure 7 panel b, Table S3).

395 **Figure 7**

396 **(a)**

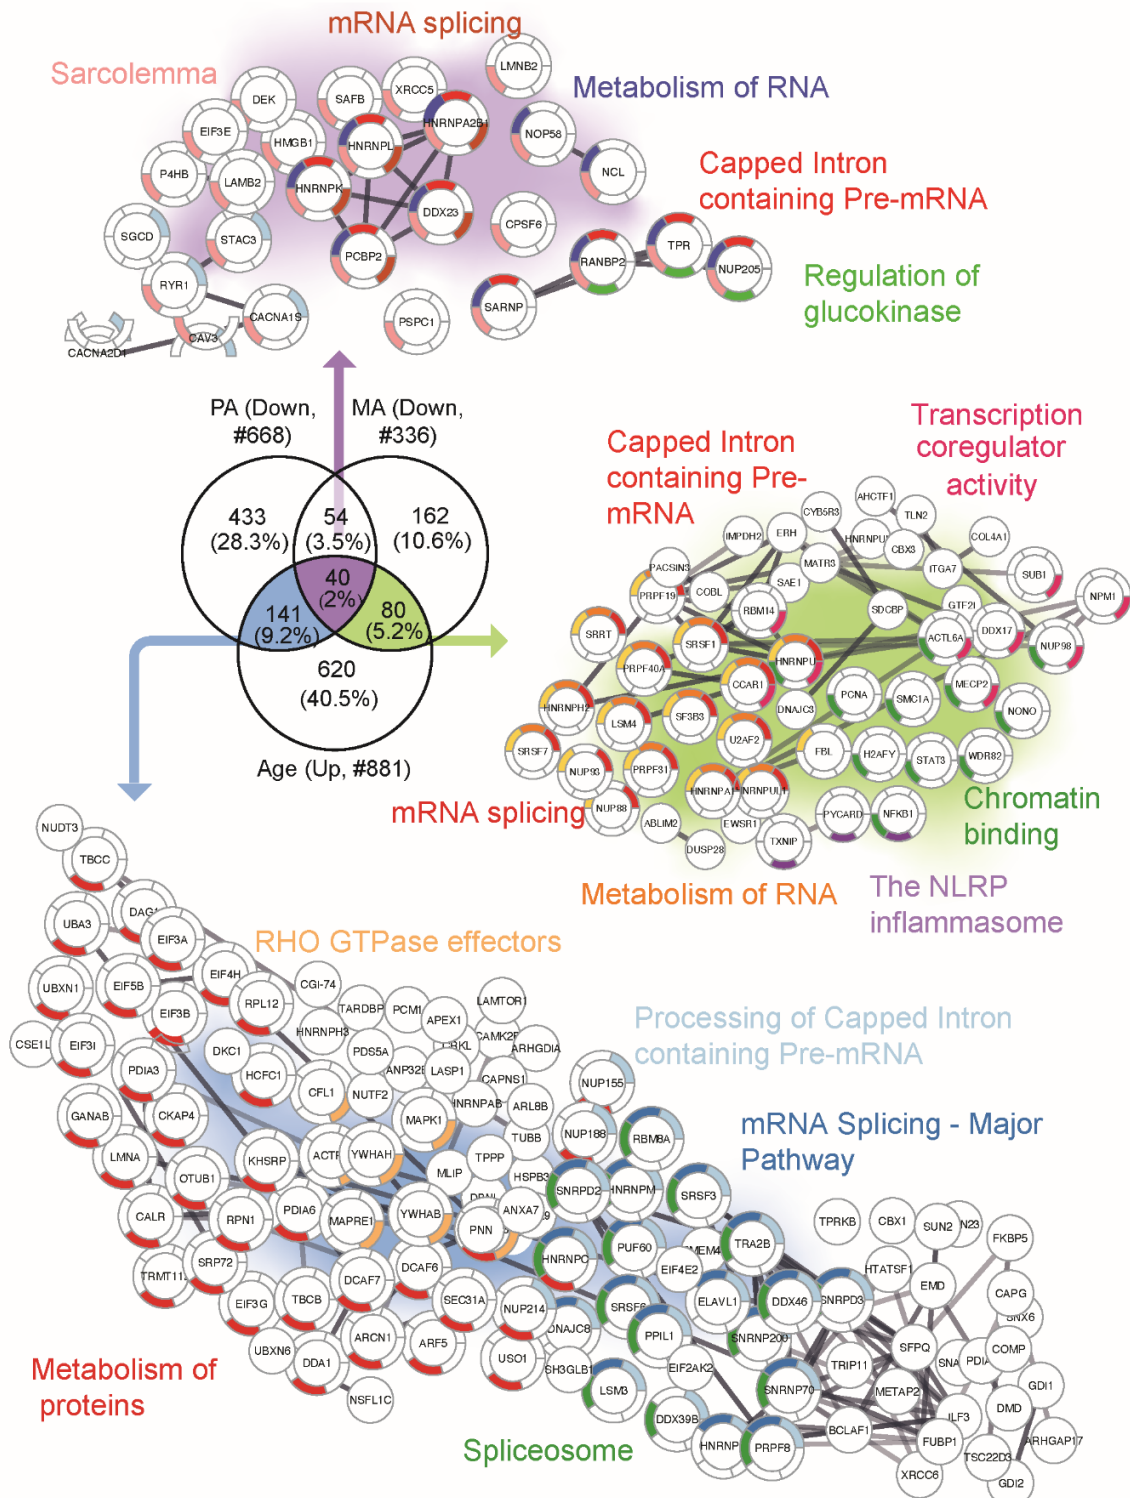

397 (b)

398

399

400

401

402

403

404

405

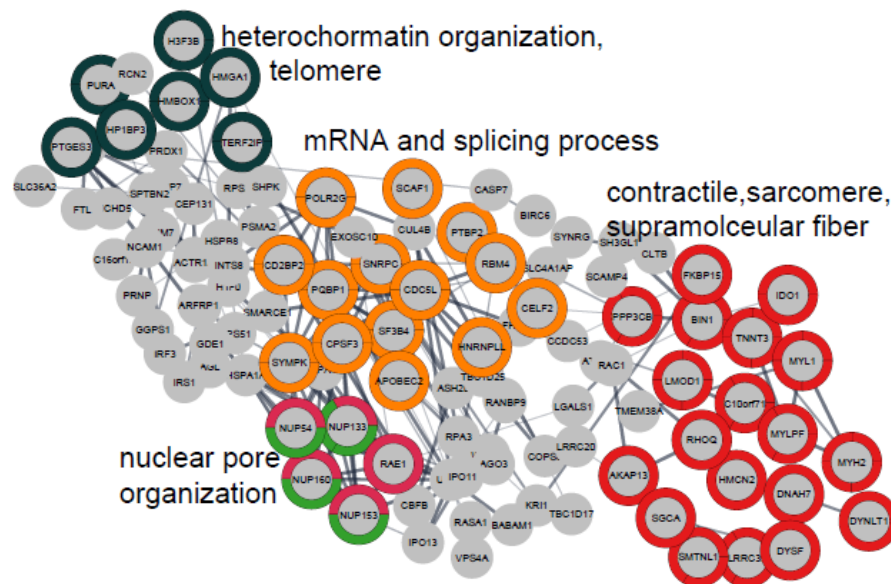

### 406 3 DISCUSSION

407 Mass spectrometry-based proteomics studies strongly suggest in a select group of individuals  
408 free of major disease risk factors and morbidity, that skeletal muscle mitochondrial proteins are  
409 underrepresented in older compared to younger persons, and, independent of age, are over-  
410 represented in those who are more physically active in daily life (Kleinert *et al.*, 2018; Ubaida-  
411 Mohien *et al.*, 2019a; Ubaida-Mohien *et al.*, 2019b). In this respect, these prior studies suggest  
412 that aging and physical activity have opposite effects on mitochondrial health. However, as most  
413 individuals' level of physical activity declines with aging, a clear-cut dissection of the effect of  
414 aging independent of declining physical activity has proven difficult to achieve. To address this  
415 question, 15 exceptionally fit and physically very active octogenarian MA were compared to 14  
416 healthy but non-athletic octogenarian NA. In accordance with our hypothesis, we found a  
417 massive overrepresentation of mitochondrial proteins and these data were consistent with the  
418 finding of higher mtDNA copy number, fewer respiratory chain compromised muscle fibers by  
419 histochemistry, and an increased ratio of mitochondrial inner membrane-bound ETC subunits  
420 relative to the outer mitochondrial membrane protein VDAC in skeletal muscle of MA  
421 octogenarians. We also found a lower abundance of proteins regulating RNA splicing in MA,  
422 confirming that in older persons with high mitochondrial function, the upregulation of the splicing  
423 machinery usually observed with older age is not occurring (Ubaida-Mohien *et al.*, 2019b).

424 In general, we found that many proteins overrepresented in MA were similar to the proteins that  
425 have been associated with higher physical activity in daily life, independent of age in previous  
426 studies (Ubaida-Mohien *et al.*, 2019a). These findings demonstrate that some of the biological  
427 mechanisms that facilitate the high function of our octogenarian MAs in spite of old age are  
428 similar to those beneficially affected by moderate physical activity in skeletal muscle (Nilsson &  
429 Tarnopolsky, 2019). However, we also found differentially represented proteins in highly  
430 functioning octogenarian MA that were unique from those affected by physical activity,  
431 suggesting unique biological mechanisms also contribute to the extreme performance capacity  
432 in this select group of individuals. This unique set of proteins unrelated to physical activity may  
433 provide novel insight on mechanisms, either genetic and/or linked to life-course exposure, that  
434 may counteract the physical function decline that is observed in the great majority of aging  
435 individuals. In total, we found 176 proteins related to mitochondria that were over-represented in  
436 MA versus NA that had not been previously linked to physical activity. For example, amongst  
437 these, 22 proteins which mediate mitochondrial protein import and are involved in establishing  
438 and modulating the mitochondrial architecture were over-represented in MA but had not been  
439 previously reported as affected by physical activity (Ubaida-Mohien *et al.*, 2019a).

440 A striking result of this study, is that 80 proteins involved with mRNA splicing, metabolism of  
441 RNA, capped intron containing pre-RNA and transcription coregulator activity that were shown  
442 previously to significantly increase with aging (Rodriguez *et al.*, 2016; Ubaida-Mohien *et al.*,  
443 2019b) were globally underrepresented in MA. These data are consistent with previous  
444 suggestions that the production of alternative splicing variants of structural and regulatory  
445 proteins are an integral part of the pre-programmed resilience strategies aimed to counteract  
446 drifts toward loss of function and damage accumulation, such as those that follow the decline of  
447 energy availability secondary to mitochondrial impairment (Bhadra *et al.*, 2020).

#### 448 Mitochondria and Aging Skeletal Muscle

449 Mitochondria have long been implicated in aging biology in general, including skeletal muscle  
450 aging. Mitochondrial derangement may contribute to functional decline with aging though  
451 various mechanisms, including but not limited to reduced energy availability for contraction and  
452 other essential cellular activities, increased production of reactive oxygen species, inflammatory  
453 signaling, and release of Ca<sup>2+</sup> and activation of caspase 3 consequent to an event known as  
454 mitochondrial permeability transition (Hepple, 2016). In addition, fragments of mitochondrial  
455 membrane or mtDNA may trigger the NLRP3 inflammasome and contribute to local and

456 systemic inflammaging (Pereira *et al.*, 2019). Hence, preserving skeletal muscle mitochondrial  
457 function is a central mechanism for maintaining skeletal muscle health with aging.

458 Further, mitochondrial proteins that cover a large variety of locations and functions were more  
459 abundant in highly functioning octogenarians than controls, including signaling proteins that fine-  
460 tune mitochondrial dynamics, mitochondrial biogenesis, TCA cycle, and respiratory electron  
461 transport. Evidence in the literature suggests that most of these changes are a consequence of  
462 higher physical activity (Ubaida-Mohien *et al.*, 2019a). In keeping with this view, we recently  
463 showed that a reduction in intrinsic mitochondrial respiratory capacity (respiration normalized to  
464 the abundance of a complex III subunit) was only seen in very sedentary but not in physically  
465 active septuagenarian men (Spendiff *et al.*, 2016), and data from the literature show that low  
466 physical activity rather than aging *per se* causes an increase in skeletal muscle mitochondrial  
467 ROS emission (Gram *et al.*, 2015).

468 The mechanisms by which physical activity attenuates oxidative stress are complex and not  
469 completely understood. On the one hand, the promotion of autophagy and mitochondrial  
470 biogenesis jointly contribute to the recycling of damaged mitochondria and subsequent  
471 replacement with healthy mitochondria that are less likely to generate excessive ROS. On the  
472 other hand, exercise in MA likely upregulates enzymatic antioxidants such as SOD2 by a NRF2-  
473 KEAP1 mechanism (Gao *et al.*, 2020). Although our proteomic analysis did not detect PGC-1 $\alpha$ ,  
474 we did observe an increase in MA skeletal muscle for *PGC-1 and ERR-induced regulator in*  
475 *muscle protein 1* (PERM1), a regulator of mitochondrial biogenesis (Cho *et al.*, 2016). In  
476 addition, the mitochondrial SIRT3 was elevated in MA muscle. Exercise activates SIRT3 by an  
477 AMP-activated protein kinase-dependent mechanism (Brandauer *et al.*, 2015), and, in turn,  
478 SIRT3 deacetylates the mitochondrial antioxidant enzyme SOD2 boosting its ROS-scavenging  
479 activity (Tao *et al.*, 2010). This is consistent with a previous study where they also reported a  
480 significantly higher level of SIRT3 and SOD2 in the skeletal muscle of master athletes (~15 y  
481 younger than studied here) compared to age-matched controls (Koltai *et al.*, 2018). Finally,  
482 mitochondrial permeability transition is an important source of elevated mitochondrial ROS in  
483 skeletal muscle (Burke *et al.*, 2021) and SIRT3, which was elevated in MA, reduces  
484 mitochondrial permeability transition by deacetylation of cyclophilin D (Hafner *et al.*, 2010).

485 The differential representation of proteins that fine-tune mitochondrial dynamics between MA  
486 and NA is particularly interesting because an optimal dynamic balance of expression between  
487 pro-fusion (OPA1, MFNs) (Tezze *et al.*, 2017) and pro-fission (DRP1) processes (Dulac *et al.*,

488 2020) is essential for mitochondrial health. Consistent with this idea, our data showed a higher  
489 abundance of pro-fusion (OPA1, MFN2) and pro-fission (OMA1) proteins, as well as a higher  
490 abundance of mitochondrial electron transport complex assembly proteins (NUBPL, COA1,  
491 ACAD9, etc.) in MA donors. Collectively, the higher abundance of these proteins in MA  
492 suggests better maintenance of processes involving mitochondrial dynamics and cristae  
493 remodeling in MA. In addition, maintained mitochondrial dynamics is also likely conducive to the  
494 better preservation of mtDNA that we observed in MA, given the importance of mitochondrial  
495 dynamics to mtDNA integrity (Bess *et al.*, 2012). Importantly, our proteomics data are consistent  
496 with phenotypic data showing a higher abundance of respiratory competent muscle fibers and  
497 higher mtDNA copy number in MA versus NA. Interestingly, there were 8 mitochondrial proteins  
498 that had a lower abundance in MA than can be expected by random chance. However, 4 of  
499 these proteins were associated with GO Biological Process lipid biosynthesis (CYB5R3, CDS2,  
500 ACSL3, and STARD7). CDS2 is an essential intermediate in the synthesis of  
501 phosphatidylglycerol, cardiolipin, and phosphatidylinositol (PI), an important regulator of lipid  
502 storage (Qi *et al.*, 2016). STARD7 is an intramitochondrial lipid transfer protein for  
503 phosphatidylcholine. These data are generally consistent with a recent magnetic resonance  
504 spectroscopy analysis of aging human muscle, showing that elderly subjects who did not exhibit  
505 significant muscle atrophy had lower levels of skeletal muscle phospholipids (Hinkley *et al.*,  
506 2020). The other 4 proteins that had lower expression in MA were PGAM5 (regulator of  
507 mitochondrial dynamics), Dimethylarginine dimethylaminohydrolase 1 (DDAH1),  
508 SHC1(mitochondrial adapter protein), and WDR26 (negative regulator in MAPK signaling  
509 pathway). The significance of the lower expression of these proteins in MA is unclear. Of note,  
510 most of these proteins are primarily located in the endoplasmic reticulum, although they are also  
511 found in mitochondria. WDR26 is expressed mostly during mitochondrial stress and hypoxia,  
512 which is less likely to occur in MA compared to controls. The underrepresentation in MA of  
513 STARD7, a protein important to efficient phosphatidylcholine import by mitochondria as well as  
514 mitochondrial function and morphogenesis, may be considered counterintuitive. However,  
515 recent studies have suggested that STARD7 is a candidate effector protein of ceramide, a lipid  
516 known for its ability to initiate a variety of mitochondria-mediated cytotoxic effects. Thus, the  
517 downregulation of STARD7 in MA may be a compensatory strategy (Bockelmann *et al.*, 2018).

518 In summary, our data suggest that overrepresentation of mitochondrial quality control proteins  
519 and mitochondrial dynamics proteins in octogenarian MA muscle likely translates to better

520 maintenance and remodeling of mitochondrial cristae, with higher energy availability that  
521 positively affects cellular adaptation to stress, and better maintenance of muscle metabolism.

522 *RNA Splicing, Nuclear Pore Complex, and Aging.*

523 Amongst the notable findings of our study is that 80 proteins involved with mRNA splicing,  
524 metabolism of RNA, capped intron containing pre-RNA and transcription coregulator activity that  
525 were shown previously to significantly increase with aging (Rodriguez *et al.*, 2016; Ubaida-  
526 Mohien *et al.*, 2019b) were globally underrepresented in MA compared to controls. Interestingly,  
527 after accounting for physical activity and age, we previously found that upregulation of  
528 spliceosome proteins is associated with higher mitochondrial oxidative capacity as measured by  
529 <sup>31</sup>P-spectroscopy (Adelnia *et al.*, 2020). Thus, the lower representation of spliceosome proteins  
530 that regulate alternative mRNA splicing in MA, coupled with the positive association between  
531 the spliceosome and mitochondrial oxidative capacity independent of age and physical activity  
532 status that we observed previously (Adelnia *et al.*, 2020), collectively suggest that alternative  
533 splicing may be part of a resilience response in the face of lower mitochondrial function with  
534 aging. Such a resilience response is not required in MA because of high mitochondrial function  
535 maintenance despite old age. Future analysis of RNA expression to examine expression of  
536 splice variants in MA versus NA would be important to further evaluate this premise.

537

538 An unexpected finding was that nuclear pore complex proteins were less represented in MA  
539 than controls. The nuclear pore complex proteins are involved in mRNA splicing regulation  
540 (Stewart, 2019), and therefore under-representation of nuclear pore complex proteins in MA  
541 may be part of a global down-regulation of splicing. In this respect, since post-translational  
542 oxidative modification and activation of mitochondrial-mediated apoptotic pathways are  
543 associated with upregulation of nuclear pore complex proteins (Lindenboim *et al.*, 2020), a  
544 higher level of mitochondrial function in MA probably requires less protein turnover and thus  
545 less synthesis of nucleoporins and structural proteins. This idea is consistent with the discordant  
546 responses of mitochondrial versus non-mitochondrial ribosomal proteins, where we observed  
547 that 38 mitochondrial ribosomal proteins from 28S and 39S were significantly higher expressed  
548 in MA, whereas cytoplasmic ribosomal proteins (RPS2, RPLP0) were less abundant in MA.

549 Proteostasis maintenance pathways are important for skeletal muscle, as components of  
550 myofibers are often damaged and must be replaced regularly. Proteins involved in proteostasis  
551 appear to have no single trend of change in MA octogenarians, with some chaperones and

552 autophagy proteins underrepresented and some overrepresented in MA. It is possible that the  
553 long-term physical activity adaptation of the skeletal muscle in MA reduces the need for  
554 replacement of muscle proteins, e.g., the higher fidelity of their mitochondria coupled with the  
555 higher expression of antioxidant proteins such as SOD2 may limit post-translational damage to  
556 proteins, thereby reducing the rate at which they need to be replaced.

#### 557 Evidence for Factors Other than Exercise in MA Proteome

558 To a large extent the results of this study are consistent with the well-established benefits of  
559 exercise on mitochondrial and skeletal muscle health (Hood *et al.*, 2019). However, the  
560 individuals we studied were world-class athletes in their eighties and it is unlikely that their high  
561 function can be accomplished by the majority of older people, even assuming that they adhere  
562 to a strict exercise regimen. We expect that a fortuitous combination of genetics and  
563 environmental factors beyond exercise *per se* make them *winners*. Consistent with the idea that  
564 factors beyond those linked to physical activity contribute to such an extreme phenotype, we  
565 observed several mitochondrial-related proteins that were uniquely upregulated in MA versus  
566 normal aging, and several proteins involving RNA processing and the inflammasome that were  
567 uniquely down-regulated in MA versus normal aging. As these proteins are not amongst those  
568 previously identified as exercise-responsive (Ubaida-Mohien *et al.*, 2019a), we refer to these as  
569 the MA-specific proteome (see Figure 6 and 7). Although our MA cohort is too small to permit  
570 assessment of genetic/hereditary factors in these protein differences, our results identify  
571 important candidate protein pathways to explore for anti-aging effects and suggest additional  
572 studies with larger numbers of subjects (and including other types of athletes) would be  
573 worthwhile.

574 *In conclusion*, our data underscore that mitochondrial pathways are key to maintaining a high  
575 level of physical function in advanced age. Furthermore, our data show that high physical  
576 function is also associated with preventing the general increase with aging in nuclear pore  
577 complex proteins and spliceosome proteins. Whereas many of the differentially represented  
578 proteins in MA overlap with those affected by daily physical activity, we also identified several  
579 proteins that typically change with aging and were uniquely countered by MA but not by physical  
580 activity. The study of these unique proteins may reveal mechanisms that allow sporadic  
581 individuals to maintain high level of physical activity late in life, and understanding these  
582 mechanisms may indicate new therapeutic strategies for attenuating sarcopenia and functional  
583 decline with aging.



## 584 **4 MATERIALS & METHODS**

### 585 **4.1 Ethical approval**

586 All procedures carried out with human subjects were done with prior approval from the  
587 Institutional Review Board of the Faculty of Medicine at McGill University (A08-M66-12B) and  
588 according to the Declaration of Helsinki. All subjects provided written informed consent.

### 589 **4.2 Human subject characteristics**

590 Age- and sex-matched octogenarian world-class track and field athletes (n=15; 8 female) and  
591 non-athlete participants (n=14, 6 female) were recruited for this study. No explicit power  
592 analysis was performed *a priori* due to the rare nature of the octogenarian world class athletes,  
593 but the premise was to select populations of widely different physical function in advanced age  
594 so that insights concerning the role of potential differences in muscle biology in the differences  
595 in physical function might be obtained.

### 596 **4.3 Sample collection**

597 Muscle cross-sectional area by MRI and a vastus lateralis muscle biopsy were performed in 15  
598 octogenarian world-class track and field athletes and 14 non-athlete age- and sex-matched non-  
599 athlete controls. A portion of muscle from a subset of 12 master athletes (MA mean age  $81.19 \pm$   
600  $5.1$  y) and 12 non-athlete controls (NA mean age  $80.94 \pm 4.5$  y) was used from these subjects  
601 for liquid-chromatography mass spectrometry to generate quantitative tandem mass tag  
602 proteomics data. In addition, we measured muscle mass by MRI, mtDNA copy number, and  
603 western blot of oxidative phosphorylation proteins.

### 604 **4.4 Muscle fiber type labeling and imaging in muscle cross-sections**

605 Ten- $\mu$ m thick sections that were serial to those used in histochemical labeling for respiratory  
606 compromised fibers were used in immunolabeling experiments to demonstrate fiber type by  
607 probing for the major myosin heavy chain (MHC) isoforms in human skeletal muscle. Sections  
608 were first hydrated with 1 x phosphate buffered saline (PBS) and blocked with 10% normal goat  
609 serum for 30 min in 1 x PBS. Sections were subsequently incubated with the following primary  
610 antibodies for 1 h at room temperature: polyclonal rabbit anti-laminin IgG (L9393, 1:700; Sigma-  
611 Aldrich), monoclonal mouse anti-MHCI IgG2b (BA-F8, 1:25), monoclonal mouse anti-MHCIIa  
612 IgG1 (Sc71, 1:200), and monoclonal mouse anti-MHCIIx IgM (6H1, 1:25). MHC primary  
613 antibodies were obtained from the Developmental Studies Hybridoma Bank (University of Iowa,

614 USA). Tissue sections then underwent 3 washes in 1 x PBS, and subsequent incubation with  
615 the following secondary antibodies for 1 h at room temperature: Alex Fluor 488 goat anti-rabbit  
616 IgG (A11008, 1:500), Alexa Fluor 350 goat anti-mouse IgG2b (A21140, 1:500), Alex Fluor 594  
617 goat anti-mouse IgG (A21125), and Alexa Fluor 488 goat anti-mouse IgM (A21042, 1:500).

618 Following immunolabeling experiments, slides were imaged with a Zeiss Axio Imager M2  
619 fluorescence microscope (Carl Zeiss, Germany) and analyzed by ImageJ (National Institutes of  
620 Health, USA) by an observer blinded to the identity of the samples. An average of  $366 \pm 131$   
621 fibers were analyzed per sample.

#### 622 **4.5 Histochemical labeling for respiratory compromised muscle fibers**

623 COX/SDH histochemistry (Old & Johnson, 1989; Taylor *et al.*, 2003) was performed to assess  
624 the activity of OXPHOS complexes IV (COX) and II (SDH), and thus identify muscle fibers with a  
625 respiratory chain deficiency (COX<sup>Neg</sup>). The COX incubation medium was prepared by adding  
626 100  $\mu$ M cytochrome *c* to 4 mM of 3,3-diaminobenzidine tetrahydrochloride (DAB) with 20  $\mu$ g of  
627 catalase. Further method details are included here (Supplemental Methods). Counts of COX  
628 positive (COX<sup>Pos</sup>), COX<sup>Int</sup>, and COX<sup>Neg</sup> myofibers were performed for the whole muscle cross-  
629 section. COX negative fibers are indicative of cells with high levels of mtDNA mutations and will  
630 thus not demonstrate the brown reaction product (oxidized DAB) during the first incubation but  
631 will stain blue following the second incubation for SDH activity. This is because the nuclear DNA  
632 entirely encodes SDH, so any mtDNA mutations will not affect its activity. In contrast, mtDNA  
633 mutations could affect complex IV activity and prevent DAB oxidation if a mutation affects a  
634 region of mtDNA containing the Cox subunit genes.

#### 635 **4.6 Mitochondrial DNA copy number**

636 Groups of 25 fibers (5 x 5 fibers) in an unstained 20- $\mu$ m thick muscle cross-section from each  
637 subject were randomly selected (random number generator & numbered grid), laser captured,  
638 and their DNA extracted using the lysis method and stored at -20°C. The products were then  
639 separated and the bands visualized using a G-Box chem imaging system (Figure 3-figure  
640 supplement 6-source data1, panel A). The mtDNA fragment was extracted and the total mtDNA  
641 copy number in muscle fibres was determined using a standard curve (Greaves *et al.*, 2010)  
642 (Figure 3-figure supplement 6-source data 1, panel B). The method details are in Supplemental  
643 Methods.

#### 644 **4.7 Sample preparation and protein extraction for MS**

645 Roughly, 5 to 8 mg of vastus lateralis muscle tissue per subject was pulverized in liquid nitrogen  
646 and mixed with the modified SDT lysis buffer (100 mM Tris, 140 mM NaCl, 4% SDS, 1% Triton  
647 X-114, pH 7.6 (Sigma)) (Wisniewski *et al.*, 2009). Tissues were sonicated, protein concentration  
648 was determined, and the sample quality was confirmed using NuPAGE®. 300 µg of muscle  
649 tissue lysate was used for tryptic digestion. Samples were basic reverse phase fractionated and  
650 analyzed in nano LCMS/MS (Q-Exactive HF) using previously published method (Ubaida-  
651 Mohien *et al.*, 2019b). The method details are in Supplemental Methods.

#### 652 **4.8 Proteomics informatics**

653 The raw MS data acquired from 24 samples (MA=12, NA=12) is converted to mgf files (using  
654 MSConvert, ProteoWizard 3.0.6002) for each sample fraction and was searched with Mascot  
655 2.4.1 and X!Tandem CYCLONE (2010.12.01.1) using the SwissProt Human sequences from  
656 Uniprot (Version Year 2017, 20,200 sequences, appended with 115 contaminants) database.  
657 The search engine was set with the following search parameters: TMT 10-plex lysine and n-  
658 terminus as fixed modifications and variable modifications of carbamidomethyl cysteine,  
659 deamidation of asparagine and glutamate, carbamylation of lysine and n-terminus, and oxidized  
660 methionine. A peptide mass tolerance of 20 ppm and 0.08 Da, respectively, and two missed  
661 cleavages were allowed for precursor and fragment ions in agreement with the instrument's  
662 known mass accuracy. Mascot and X!Tandem search engine results were analyzed in Scaffold  
663 Q+ 4.4.6 (Proteome Software, Inc.). The TMT channels' isotopic purity was corrected according  
664 to the TMT kit. Peptide and protein probability was calculated by PeptideProphet and  
665 ProteinProphet probability model (further details in Supplemental Methods).

666 The log2 transformed reporter ion abundance was normalized by median subtraction from all  
667 reporter ion intensity spectra belonging to a protein across all channels. Relative protein  
668 abundance was estimated by the median of all peptides for a protein combined. Protein sample  
669 loading effects from sample preparations were corrected by median polishing, i.e., subtracting  
670 the channel median from the relative abundance estimate across all channels to have a median  
671 zero as described elsewhere (Herbrich *et al.*, 2013) (Kammers *et al.*, 2015). Quantified proteins  
672 were annotated, and corresponding gene names were assigned to each protein for simplicity  
673 and data representation. Annotation of the proteins was performed by manual curation and  
674 combining information from Uniprot, GO, and Reactome database. Further bioinformatics  
675 analysis was performed using R programming language (3.4.3) and the free libraries available

676 on Bioconductor. The validation of the age effects and physical activity was performed by  
677 comparing the MA dataset with the GESTALT dataset. The details of the GESTALT dataset is  
678 available on PRIDE repository PXD011967, and GESTALT subject characteristics are provided  
679 in Figure 5-figure supplement 1.

#### 680 **4.9 Statistical analyses**

681 Statistical comparisons of physical function tests, thigh cross-sectional area, mtDNA copy  
682 number, and protein abundance by Western blot (VDAC) were performed using a two-tailed  
683 Student's t-test, with  $P < 0.05$ . Statistical comparison of fiber type proportion, fiber size by type,  
684 Western blot (oxphos complex subunit abundance), and the abundance of respiratory chain  
685 compromised fibers was performed by Two-Way ANOVA, with a Sidak multiple comparison  
686 posthoc test.

687 For LCMS analyses, protein significance was determined with p-values derived from one-way  
688 analysis of variance test to check any possible statistically significant difference between  
689 groups. The  $p$  value threshold for a protein was considered as significant if  $p < 0.05$ . Partial Least  
690 Square analysis (PLS) was used to derive models with the classification that maximized the  
691 variance between MA and NA groups. PLS loadings were derived from log<sub>2</sub> normalized protein  
692 reporter ion intensity from all proteins. The statistical method was performed using R 3.3.6 with  
693 inbuilt libraries. Heat maps and hierarchical cluster analyses were performed using the non-  
694 linear minimization package in R. GraphPad PRISM 6.07, and R Bioconductor packages were  
695 used for statistical analysis and generation of figures. STRING analysis (Szklarczyk *et al.*, 2019)  
696 was used for obtaining protein-protein interaction network. Enrichment analysis was performed  
697 by ClueGO (Bindea *et al.*, 2009) and PANTHER; the pathways were mapped and visualized by  
698 Cytoscape 3.7.2. One-way ANOVA, nonparametric, and chi-square tests (continuous and  
699 categorical variables) were used to test for sample differences.

700

#### 701 **TABLE LEGENDS**

702 Table 1. Characteristics of NA and MA.

703 Table 2. Training and competition history of octogenarian MA.

#### 704 **FIGURE LEGENDS**

705 **Figure 1.** (a-f) Clinical function tests in NA and MA. (g) Thigh cross sectional image of an 80 y  
706 old male NA (h) and an 83 y old male MA. (i) The total cross-sectional area (CSA) of the  
707 thigh/height was greater in MA than NA. (j) Maximal isokinetic strength during knee extension  
708 was greater in MA than NA. Graphs show means and standard deviations. Groups were  
709 compared by a two-tailed Student's t-test, with  $P < 0.05$ .

710 **Figure 2.** The quantitative proteome reveals temporal proteome changes between MA and NA.  
711 (a) Number of proteins quantified among 3 TMT batches. (b) Quantitative protein expression  
712 between 3 TMT batches. (c) PLS plot of MA and NA donors. Red circles are MA donors and  
713 cyan circles are NA donors. (d) Proteins differentially expressed between MA and NA. Each  
714 circle is a protein, red circles are proteins increased in abundance in MA, and blue circles are  
715 proteins decreased in abundance in MA. (e) Cellular location of the differentially expressed  
716 proteins in MA and the number of proteins encoded for each component is shown (X-axis).

717 **Figure 3.** Mitochondrial protein enrichment in octogenarian MA. (a) Dysregulation of significant  
718 mitochondrial proteins shown as red circles. (b) Functional classification of mitochondrial  
719 proteins with protein-protein interaction enrichment  $p$ -value  $< 1.0e-16$ . (c) Heatmap showing  
720 upregulated respiratory chain complex proteins in MA. 71 complex proteins on y-axis. X-axis  
721 shows donors. (d) Enrichment of mitochondrial sirtuins SIRT5 and SIRT3 in muscle of MA  
722 versus NA. (e) Respiratory chain compromised fibers in skeletal muscle. COX/SDH image  
723 showing the identification of COXPos (brown cells), COXInt (empty stars), and COXneg muscle  
724 fibers (solid star). COXNeg fibers have lost complex IV activity and appear blue, COXInt retain  
725 small amounts of COX activity and appear grey, and COXPos fibers have normal COX function  
726 and appear brown. Scale = 200  $\mu$ m. (f) Quantification revealed a significantly higher abundance  
727 of healthy COXPos fibers ( $*p=0.0291$ ) and fewer respiratory chain compromised (COXInt)  
728 myofibers ( $*p=0.0448$ ) in MA compared to NA. (g) Upregulation of mtDNA in MA. MA and NA  
729 donors are shown on X-axis; quantified mtDNA proteins are shown on Y axis. (h) Increased  
730 mtDNA copy number in MAs. Absolute mtDNA copy number was determined using a standard  
731 curve constructed from known amounts of mtDNA. MA had significantly more copies of mtDNA  
732 than NA ( $*p=0.0177$ ; t-test). Graph shows the means and standard deviation. (i) Protein groups  
733 that maintain the functional integrity of mitochondria were higher in MA. (j) Upregulated MA  
734 proteins in MICOS complex system and the fold change of the proteins. Cellular location of the  
735 proteins is color coded.

736 **Figure 4.** Dysregulation of spliceosome pathway proteins in octogenarian MA. (a)  
737 Underrepresentation of spliceosome pathway proteins. Significant spliceosome proteins (22)  
738 underrepresented in MA are marked as red circles and all other proteins are marked as grey  
739 circle. X-axis shows log<sub>2</sub> fold expression of the proteins in MA versus NA. (b) The functional  
740 characteristics of the spliceosome proteins are shown. Each GO annotation cluster is color  
741 coded. (c) Down-regulation of TRA2 protein in MA donors. Y-axis shows the log<sub>2</sub> relative  
742 protein abundance. (d) Interaction partners of TRA2 protein; with RNA splicing regulation  
743 proteins, mRNA major splicing pathway, and mRNA minor splicing pathway proteins.

744 **Figure 5.** Proteins that decline with aging but are antagonized in physically active subjects  
745 (GESTALT, n=58) and MA group. Enriched pathways from 50 proteins which increase with PA  
746 and MA and decrease with Age are shown (top), pathways from 12 proteins which are in  
747 common between PA and Age (left) and enriched pathways from 22 proteins which are in  
748 common between MA and Age (right). Top enriched pathways are color coded (significance  
749 threshold FDR <0.05). Proteins without interaction partners are omitted from visualization.

750 **Figure 6:** MA exclusive over-represented proteins. The subset of 301 MA+ proteome  
751 represents cluster of mitochondrial translation pathway enrichment (blue circles, 36 proteins),  
752 mitochondrial inner membrane (red circles, 75 proteins) and mitochondrial matrix proteins (pink,  
753 65 proteins). Mitochondrial translation pathway proteins are localized either as inner membrane  
754 proteins or as matrix proteins. Each circle node is a protein exclusive to MA from (MA+, PA+  
755 and Age-) analysis, Nodes without any interaction are excluded from the enrichment analysis.

756 **Figure 7:** MA exclusive under-represented proteins. (a) Proteins that increase with aging but  
757 are antagonized in physically active subjects (GESTALT, n=58) and MA group. Enriched  
758 pathways from 40 proteins which decrease with PA and MA and increase with Age are shown  
759 (top), pathways from 141 proteins which are in common between PA and Age (left) and  
760 enriched pathways from 80 proteins which are in common between MA and Age (right) are  
761 shown. Network analysis and enrichment analysis are performed using STRING analysis tool;  
762 the top enriched pathways are color coded (p <0.05). Proteins without interaction partners are  
763 omitted from visualization. (b) The subset of 162 MA- proteome represents cluster of chromatin  
764 organization, nuclear pore, mRNA splicing process and contractile fiber proteins. This cluster of  
765 proteins appear unrelated to physical activity and may reflect unique biology in MA group.  
766 Protein protein interaction pathways and GO cellular components shown here are significantly  
767 enriched (p < 1.0e-16).

768

769 **ACKNOWLEDGMENTS**

770 We thank the Master Athlete study participants and the GESTALT participants. We thank  
771 Lauren Brick for assistance with figure design. Funding for this study was provided by operating  
772 grants from the Canadian Institutes of Health Research (MOP 84408 to TT and MOP 125986 to  
773 RTH). Supported in part by the Intramural Research Program of the National Institute on Aging,  
774 NIH, Baltimore, MD, United States.

775 **CONFLICT OF INTEREST**

776 The authors declare no conflict of interest.

777 **AUTHOR CONTRIBUTIONS**

778 LF, TT and RH designed the research. TT and JM collected the muscle biopsies and SS  
779 performed mtDNA experiments. SS, NM, and MF performed phenotypical analysis of the data.  
780 CU, AL designed the mass spectrometry experiment and AL generated the data. CU, LF, RH  
781 performed the data analysis, prepared the figures, and analyzed the data. All authors wrote the  
782 manuscript and gave final approval for publication.

783 **DATA AVAILABILITY**

784 The mass spectrometry proteomics data have been deposited to the MassIVE with the dataset  
785 identifier MSV000086195 (<ftp://MSV000086195@massive.ucsd.edu>), reviewer user name (  
786 MSV000086195\_reviewer).

787

## 788 REFERENCES

- 789 Adelnia, F., Ubaida-Mohien, C., Moaddel, R., Shardell, M., Lyashkov, A., Fishbein, K. W., . . . Ferrucci, L.  
790 (2020). Proteomic signatures of in vivo muscle oxidative capacity in healthy adults. *Aging Cell*,  
791 *19*(4), e13124. doi:10.1111/accel.13124
- 792 Ahn, B. H., Kim, H. S., Song, S., Lee, I. H., Liu, J., Vassilopoulos, A., . . . Finkel, T. (2008). A role for the  
793 mitochondrial deacetylase Sirt3 in regulating energy homeostasis. *Proc Natl Acad Sci U S A*,  
794 *105*(38), 14447-14452. doi:10.1073/pnas.0803790105
- 795 Bess, A. S., Crocker, T. L., Ryde, I. T., & Meyer, J. N. (2012). Mitochondrial dynamics and autophagy aid in  
796 removal of persistent mitochondrial DNA damage in *Caenorhabditis elegans*. *Nucleic Acids Res*,  
797 *40*(16), 7916-7931. doi:10.1093/nar/gks532
- 798 Bhadra, M., Howell, P., Dutta, S., Heintz, C., & Mair, W. B. (2020). Alternative splicing in aging and  
799 longevity. *Hum Genet*, *139*(3), 357-369. doi:10.1007/s00439-019-02094-6
- 800 Bindea, G., Mlecnik, B., Hackl, H., Charoentong, P., Tosolini, M., Kirilovsky, A., . . . Galon, J. (2009).  
801 ClueGO: a Cytoscape plug-in to decipher functionally grouped gene ontology and pathway  
802 annotation networks. *Bioinformatics*, *25*(8), 1091-1093. doi:10.1093/bioinformatics/btp101
- 803 Brandauer, J., Andersen, M. A., Kellezi, H., Risis, S., Frosig, C., Vienberg, S. G., & Trebak, J. T. (2015).  
804 AMP-activated protein kinase controls exercise training- and AICAR-induced increases in SIRT3  
805 and MnSOD. *Front Physiol*, *6*, 85. doi:10.3389/fphys.2015.00085
- 806 Bua, E., Johnson, J., Herbst, A., Delong, B., McKenzie, D., Salamat, S., & Aiken, J. M. (2006).  
807 Mitochondrial DNA-deletion mutations accumulate intracellularly to detrimental levels in aged  
808 human skeletal muscle fibers. *Am J Hum. Genet.*, *79*(3), 469-480.
- 809 Cawthon, P. M., Travison, T. G., Manini, T. M., Patel, S., Pencina, K. M., Fielding, R. A., . . . Outcomes  
810 Consortium Conference, p. (2019). Establishing the Link Between Lean Mass and Grip Strength  
811 Cut-points With Mobility Disability and Other Health Outcomes: Proceedings of the Sarcopenia  
812 Definition and Outcomes Consortium Conference. *J Gerontol A Biol Sci Med Sci*.  
813 doi:10.1093/gerona/glz081
- 814 Cho, Y., Hazen, B. C., Gandra, P. G., Ward, S. R., Schenk, S., Russell, A. P., & Kralli, A. (2016). Perm1  
815 enhances mitochondrial biogenesis, oxidative capacity, and fatigue resistance in adult skeletal  
816 muscle. *FASEB J*, *30*(2), 674-687. doi:10.1096/fj.15-276360
- 817 Cimen, H., Han, M. J., Yang, Y., Tong, Q., Koc, H., & Koc, E. C. (2010). Regulation of succinate  
818 dehydrogenase activity by SIRT3 in mammalian mitochondria. *Biochemistry*, *49*(2), 304-311.  
819 doi:10.1021/bi901627u
- 820 Cogliati, S., Frezza, C., Soriano, M. E., Varanita, T., Quintana-Cabrera, R., Corrado, M., . . . Scorrano, L.  
821 (2013). Mitochondrial cristae shape determines respiratory chain supercomplexes assembly and  
822 respiratory efficiency. *Cell*, *155*(1), 160-171. doi:10.1016/j.cell.2013.08.032
- 823 Deschenes, M., & Chabot, B. (2017). The emerging role of alternative splicing in senescence and aging.  
824 *Aging Cell*, *16*(5), 918-933. doi:10.1111/accel.12646
- 825 Dulac, M., Leduc-Gaudet, J. P., Reynaud, O., Ayoub, M. B., Guerin, A., Finkelchtein, M., . . . Gousspillou, G.  
826 (2020). Drp1 knockdown induces severe muscle atrophy and remodelling, mitochondrial  
827 dysfunction, autophagy impairment and denervation. *J Physiol*, *598*(17), 3691-3710.  
828 doi:10.1113/JP279802
- 829 Gao, L., Kumar, V., Vellichirammal, N. N., Park, S. Y., Rudebush, T. L., Yu, L., . . . Zucker, I. H. (2020).  
830 Functional, proteomic and bioinformatic analyses of Nrf2- and Keap1- null skeletal muscle. *J*  
831 *Physiol*. doi:10.1113/JP280176
- 832 Goodpaster, B. H., Park, S. W., Harris, T. B., Kritchevsky, S. B., Nevitt, M., Schwartz, A. V., . . . Newman, A.  
833 B. (2006). The loss of skeletal muscle strength, mass, and quality in older adults: the health,  
834 aging and body composition study. *J Gerontol A Biol Sci Med Sci*, *61*(10), 1059-1064.



- 835 Gram, M., Vigelso, A., Yokota, T., Helge, J. W., Dela, F., & Hey-Mogensen, M. (2015). Skeletal muscle  
836 mitochondrial H<sub>2</sub>O<sub>2</sub> emission increases with immobilization and decreases after aerobic  
837 training in young and older men. *J Physiol*, *593*(17), 4011-4027. doi:10.1113/JP270211
- 838 Greaves, L. C., Yu-Wai-Man, P., Blakely, E. L., Krishnan, K. J., Beadle, N. E., Kerin, J., . . . Taylor, R. W.  
839 (2010). Mitochondrial DNA defects and selective extraocular muscle involvement in CPEO. *Invest*  
840 *Ophthalmol Vis Sci*, *51*(7), 3340-3346. doi:10.1167/iovs.09-4659
- 841 Harries, L. W., Hernandez, D., Henley, W., Wood, A. R., Holly, A. C., Bradley-Smith, R. M., . . . Melzer, D.  
842 (2011). Human aging is characterized by focused changes in gene expression and deregulation of  
843 alternative splicing. *Aging Cell*, *10*(5), 868-878. doi:10.1111/j.1474-9726.2011.00726.x
- 844 Hepple, R. T. (2016). Impact of aging on mitochondrial function in cardiac and skeletal muscle. *Free*  
845 *Radic Biol Med*, *98*, 177-186. doi:10.1016/j.freeradbiomed.2016.03.017
- 846 Herbrich, S. M., Cole, R. N., West, K. P., Jr., Schulze, K., Yager, J. D., Groopman, J. D., . . . Ruczinski, I.  
847 (2013). Statistical inference from multiple iTRAQ experiments without using common reference  
848 standards. *J Proteome Res*, *12*(2), 594-604. doi:10.1021/pr300624g
- 849 Hinkley, J. M., Cornell, H. H., Standley, R. A., Chen, E. Y., Narain, N. R., Greenwood, B. P., . . . Coen, P. M.  
850 (2020). Older adults with sarcopenia have distinct skeletal muscle phosphodiester,  
851 phosphocreatine, and phospholipid profiles. *Aging Cell*, *19*(6), e13135. doi:10.1111/acel.13135
- 852 Holly, A. C., Melzer, D., Pilling, L. C., Fellows, A. C., Tanaka, T., Ferrucci, L., & Harries, L. W. (2013).  
853 Changes in splicing factor expression are associated with advancing age in man. *Mech Ageing*  
854 *Dev*, *134*(9), 356-366. doi:10.1016/j.mad.2013.05.006
- 855 Hood, D. A., Memme, J. M., Oliveira, A. N., & Triolo, M. (2019). Maintenance of Skeletal Muscle  
856 Mitochondria in Health, Exercise, and Aging. *Annu Rev Physiol*, *81*, 19-41. doi:10.1146/annurev-  
857 physiol-020518-114310
- 858 Huynen, M. A., Muhlmeister, M., Gotthardt, K., Guerrero-Castillo, S., & Brandt, U. (2016). Evolution and  
859 structural organization of the mitochondrial contact site (MICOS) complex and the  
860 mitochondrial intermembrane space bridging (MIB) complex. *Biochim Biophys Acta*, *1863*(1), 91-  
861 101. doi:10.1016/j.bbamcr.2015.10.009
- 862 John, G. B., Shang, Y., Li, L., Renken, C., Mannella, C. A., Selker, J. M., . . . Zha, J. (2005). The  
863 mitochondrial inner membrane protein mitofilin controls cristae morphology. *Mol Biol Cell*,  
864 *16*(3), 1543-1554. doi:10.1091/mbc.e04-08-0697
- 865 Kammers, K., Cole, R. N., Tiengwe, C., & Ruczinski, I. (2015). Detecting Significant Changes in Protein  
866 Abundance. *EuPA Open Proteom*, *7*, 11-19. doi:10.1016/j.euprot.2015.02.002
- 867 Kleinert, M., Parker, B. L., Jensen, T. E., Raun, S. H., Pham, P., Han, X., . . . Sylow, L. (2018). Quantitative  
868 proteomic characterization of cellular pathways associated with altered insulin sensitivity in  
869 skeletal muscle following high-fat diet feeding and exercise training. *Sci Rep*, *8*(1), 10723.  
870 doi:10.1038/s41598-018-28540-5
- 871 Koltai, E., Bori, Z., Osvath, P., Ihasz, F., Peter, S., Toth, G., . . . Radak, Z. (2018). Master athletes have  
872 higher miR-7, SIRT3 and SOD2 expression in skeletal muscle than age-matched sedentary  
873 controls. *Redox Biol*, *19*, 46-51. doi:10.1016/j.redox.2018.07.022
- 874 Lindenboim, L., Zohar, H., Worman, H. J., & Stein, R. (2020). The nuclear envelope: target and mediator  
875 of the apoptotic process. *Cell Death Discov*, *6*, 29. doi:10.1038/s41420-020-0256-5
- 876 Mishra, P., Carelli, V., Manfredi, G., & Chan, D. C. (2014). Proteolytic cleavage of Opa1 stimulates  
877 mitochondrial inner membrane fusion and couples fusion to oxidative phosphorylation. *Cell*  
878 *Metab*, *19*(4), 630-641. doi:10.1016/j.cmet.2014.03.011
- 879 Mounier, R., Theret, M., Lantier, L., Foretz, M., & Viollet, B. (2015). Expanding roles for AMPK in skeletal  
880 muscle plasticity. *Trends Endocrinol Metab*, *26*(6), 275-286. doi:10.1016/j.tem.2015.02.009
- 881 Mueller, E. E., Mayr, J. A., Zimmermann, F. A., Feichtinger, R. G., Stanger, O., Sperl, W., & Kofler, B.  
882 (2012). Reduction of nuclear encoded enzymes of mitochondrial energy metabolism in cells

- 883 devoid of mitochondrial DNA. *Biochemical and Biophysical Research Communications*, 417(3),  
884 1052-1057. doi:10.1016/j.bbrc.2011.12.093
- 885 Muller-Hocker, J., Seibel, P., Schneiderbanger, K., & Kadenbach, B. (1993). Different in situ hybridization  
886 patterns of mitochondrial DNA in cytochrome c oxidase-deficient extraocular muscle fibres in  
887 the elderly. *Virchows Arch.A Pathol.Anat.Histopathol.*, 422(1), 7-15.
- 888 Murphy, J. L., Ratnaik, T. E., Shang, E., Falkous, G., Blakely, E. L., Alston, C. L., . . . Turnbull, D. M. (2012).  
889 Cytochrome c oxidase-intermediate fibres: importance in understanding the pathogenesis and  
890 treatment of mitochondrial myopathy. *Neuromuscul Disord*, 22(8), 690-698.  
891 doi:10.1016/j.nmd.2012.04.003
- 892 Nilsson, M. I., & Tarnopolsky, M. A. (2019). Mitochondria and Aging-The Role of Exercise as a  
893 Countermeasure. *Biology (Basel)*, 8(2). doi:10.3390/biology8020040
- 894 Old, S. L., & Johnson, M. A. (1989). Methods of microphotometric assay of succinate dehydrogenase and  
895 cytochrome c oxidase activities for use on human skeletal muscle. *Histochemical Journal*, 21,  
896 545-555.
- 897 Ott, C., Ross, K., Straub, S., Thiede, B., Gotz, M., Goosmann, C., . . . Kozjak-Pavlovic, V. (2012). Sam50  
898 functions in mitochondrial intermembrane space bridging and biogenesis of respiratory  
899 complexes. *Mol Cell Biol*, 32(6), 1173-1188. doi:10.1128/MCB.06388-11
- 900 Pereira, C. A., Carlos, D., Ferreira, N. S., Silva, J. F., Zanotto, C. Z., Zamboni, D. S., . . . Tostes, R. C. (2019).  
901 Mitochondrial DNA Promotes NLRP3 Inflammasome Activation and Contributes to Endothelial  
902 Dysfunction and Inflammation in Type 1 Diabetes. *Front Physiol*, 10, 1557.  
903 doi:10.3389/fphys.2019.01557
- 904 Power, G. A., Allen, M. D., Gilmore, K. J., Stashuk, D. W., Doherty, T. J., Hepple, R. T., . . . Rice, C. L.  
905 (2016). Motor unit number and transmission stability in octogenarian world class athletes: Can  
906 age-related deficits be outrun? *J Appl Physiol* (1985), 121(4), 1013-1020.  
907 doi:10.1152/jappphysiol.00149.2016
- 908 Qi, Y., Kapterian, T. S., Du, X., Ma, Q., Fei, W., Zhang, Y., . . . Yang, H. (2016). CDP-diacylglycerol synthases  
909 regulate the growth of lipid droplets and adipocyte development. *J Lipid Res*, 57(5), 767-780.  
910 doi:10.1194/jlr.M060574
- 911 Rodriguez, S. A., Grochova, D., McKenna, T., Borate, B., Trivedi, N. S., Erdos, M. R., & Eriksson, M. (2016).  
912 Global genome splicing analysis reveals an increased number of alternatively spliced genes with  
913 aging. *Aging Cell*, 15(2), 267-278. doi:10.1111/accel.12433
- 914 Sonjak, V., Jacob, K., Morais, J. A., Rivera-Zengotita, M., Spendiff, S., Spake, C., . . . Hepple, R. T. (2019).  
915 Fidelity of muscle fibre reinnervation modulates ageing muscle impact in elderly women. *J*  
916 *Physiol*, 597(19), 5009-5023. doi:10.1113/JP278261
- 917 Spendiff, S., Vuda, M., Gousspillou, G., Aare, S., Perez, A., Morais, J. A., . . . Hepple, R. T. (2016).  
918 Denervation drives mitochondrial dysfunction in skeletal muscle of octogenarians. *J Physiol*,  
919 594(24), 7361-7379. doi:10.1113/JP272487
- 920 Stewart, M. (2019). Polyadenylation and nuclear export of mRNAs. *J Biol Chem*, 294(9), 2977-2987.  
921 doi:10.1074/jbc.REV118.005594
- 922 Strambio-De-Castillia, C., Niepel, M., & Rout, M. P. (2010). The nuclear pore complex: bridging nuclear  
923 transport and gene regulation. *Nat Rev Mol Cell Biol*, 11(7), 490-501. doi:10.1038/nrm2928
- 924 Szklarczyk, D., Gable, A. L., Lyon, D., Junge, A., Wyder, S., Huerta-Cepas, J., . . . Mering, C. V. (2019).  
925 STRING v11: protein-protein association networks with increased coverage, supporting  
926 functional discovery in genome-wide experimental datasets. *Nucleic Acids Res*, 47(D1), D607-  
927 D613. doi:10.1093/nar/gky1131
- 928 Tao, R., Coleman, M. C., Pennington, J. D., Ozden, O., Park, S. H., Jiang, H., . . . Gius, D. (2010). Sirt3-  
929 mediated deacetylation of evolutionarily conserved lysine 122 regulates MnSOD activity in  
930 response to stress. *Mol Cell*, 40(6), 893-904. doi:10.1016/j.molcel.2010.12.013

- 931 Taylor, R. W., Barron, M. J., Borthwick, G. M., Gospel, A., Chinnery, P. F., Samuels, D. C., . . . Turnbull, D.  
932 M. (2003). Mitochondrial DNA mutations in human colonic crypt stem cells. *Journal of Clinical*  
933 *Investigation*, 112(9), 1351-1360.
- 934 Tezze, C., Romanello, V., Desbats, M. A., Fadini, G. P., Albiero, M., Favaro, G., . . . Sandri, M. (2017). Age-  
935 Associated Loss of OPA1 in Muscle Impacts Muscle Mass, Metabolic Homeostasis, Systemic  
936 Inflammation, and Epithelial Senescence. *Cell Metab*, 25(6), 1374-1389 e1376.  
937 doi:10.1016/j.cmet.2017.04.021
- 938 Ubaida-Mohien, C., Gonzalez-Freire, M., Lyashkov, A., Moaddel, R., Chia, C. W., Simonsick, E. M., . . .  
939 Ferrucci, L. (2019). Physical Activity Associated Proteomics of Skeletal Muscle: Being Physically  
940 Active in Daily Life May Protect Skeletal Muscle From Aging. *Front Physiol*, 10, 312.  
941 doi:10.3389/fphys.2019.00312
- 942 Ubaida-Mohien, C., Lyashkov, A., Gonzalez-Freire, M., Tharakan, R., Shardell, M., Moaddel, R., . . .  
943 Ferrucci, L. (2019). Discovery proteomics in aging human skeletal muscle finds change in  
944 spliceosome, immunity, proteostasis and mitochondria. *Elife*, 8. doi:10.7554/eLife.49874
- 945 Wentz, S. R., & Rout, M. P. (2010). The nuclear pore complex and nuclear transport. *Cold Spring Harb*  
946 *Perspect Biol*, 2(10), a000562. doi:10.1101/cshperspect.a000562
- 947 Wisniewski, J. R., Zougman, A., Nagaraj, N., & Mann, M. (2009). Universal sample preparation method  
948 for proteome analysis. *Nat Methods*, 6(5), 359-362. doi:10.1038/nmeth.1322

949

## 950 **SUPPLEMENTARY METHOD, FIGURES**

### 951 **Supplemental Method**

#### 952 **4.4 Histochemical labeling for respiratory compromised muscle fibers**

953 COX/SDH histochemistry (Old & Johnson, 1989; Taylor *et al.*, 2003) was performed to assess  
954 the activity of OXPHOS complexes IV (COX) and II (SDH), and thus identify muscle fibers with a  
955 respiratory chain deficiency (COX<sup>Neg</sup>). The COX incubation medium was prepared by adding  
956 100  $\mu$ M cytochrome *c* to 4 mM of 3,3-diaminobenzidine tetrahydrochloride (DAB) with 20  $\mu$ g of  
957 catalase. The slides were incubated for 45 minutes at 37°C in a humidified chamber. Following  
958 three washes in phosphate-buffered saline (PBS), SDH incubation medium (130 mM sodium  
959 succinate, 200  $\mu$ M phenazine methosulphate, 1 mM sodium azide, and 1.5 mM NitroBlue  
960 tetrazolium) was added to the sections. The sections were again incubated for 45 minutes at  
961 37°C, washed x3 PBS, and then dehydrated through a graded ethanol series and xylene before  
962 being mounted in DPX. Images of the whole muscle section were captured on a Zeiss Axio  
963 Imager M2 fluorescent microscope (Zeiss, Germany). Counts of COX positive (COX<sup>Pos</sup>), COX<sup>Int</sup>,  
964 and COX<sup>Neg</sup> myofibers were performed for the whole muscle cross-section. COX negative fibers  
965 are indicative of cells with high levels of mtDNA mutations (Bua *et al.*, 2006a; Murphy *et al.*,  
966 2012b) and will thus not demonstrate the brown reaction product (oxidized DAB) during the first

967 incubation but will stain blue following the second incubation for SDH activity. This is because  
968 the nuclear DNA entirely encodes SDH, so any mtDNA mutations will not affect its activity. In  
969 contrast, mtDNA mutations could affect complex IV activity and prevent DAB oxidation if a  
970 mutation affects a region of mtDNA containing the Cox subunit genes.

#### 971 **4.5 Mitochondrial DNA copy number**

972 Groups of 25 fibers (5 x 5 fibers) in an unstained 20- $\mu$ m thick muscle cross-section were  
973 randomly selected (random number generator & numbered grid), laser captured, and their DNA  
974 extracted using the lysis method (Spendiff *et al.*, 2013) and stored at -20oC. The products were  
975 then separated on a 1% agarose gel containing Sybr® Safe DNA Gel Stain at 70 V for 30 mins,  
976 and the bands visualized using a G-Box chem imaging system (Figure 1–figure supplement 1a).  
977 The mtDNA fragment was extracted using a QiAquick Gel Extraction Kit and quantified using a  
978 NanoDrop-2000 spectrophotometer (Thermo scientific). Total mtDNA copy number in muscle  
979 fibers was determined using a standard curve created from the amplification of MTND1 (1011bp  
980 fragment, forward primer: 5' TGTA AACGACGGCCAGT 3', reverse primer: 5'  
981 CAGGAAACAGCTATGACC) (Greaves *et al.*, 2010) (Figure 1–figure supplement 1b). The  
982 products were separated on a 1% agarose gel, and the mtDNA fragment extracted using a  
983 QiAquick Gel Extraction Kit and quantified with a NanoDrop-2000 spectrophotometer (Thermo  
984 scientific). A standard curve was generated by serially diluting down the sample in dH2O.  
985 Groups of 25 fibres (5 x 5 fibres) were randomly selected (random number generator &  
986 numbered grid) and laser captured. Samples along with the standard curve were run in triplicate  
987 using an MTND1 TaqMan® qPCR assay (Forward primer: 5' CCCTAAAACCCGCCACATCT 3',  
988 reverse primer: 5' GAGCGATGGTGAGAGCTAAGGT 3', probe: 5'  
989 VIC- CCATCACCCCTCTACATCACCGCCC 3'). The total mtDNA copy number was then  
990 determined using the sample Cq values and the equation generated from the standard curve.  
991 Results were divided by the total area of the captured cells to give mtDNA copy number per  
992 area.

#### 993 **4.6 Western blotting for mitochondrial proteins**

994 Western blotting for representative mitochondrial proteins was performed as previously  
995 (Spendiff *et al.*, 2016). Briefly, 10-20 mg of muscle was homogenized in a Retch mixer mill  
996 (MM400) with 10 x (w/v) of extraction buffer (50 mM Tris base, 150 mM NaCl, 1% Triton X-100,  
997 0.5% sodium deoxycolate, 0.1% sodium dodecyl sulphate, and 10 ul per ml of Protease Inhibitor

998 Cocktail. Following 2 h of gentle agitation at 4°C, samples were centrifuged at 12,000 g for 20  
999 min at 4°C, and the supernatant removed for protein assessment by Bradford assay. Samples  
1000 were diluted in 4 x Laemmli buffer to yield a final protein concentration of 2 µg per ml and then  
1001 boiled for 5 min at 95°C. Immunoblotting was done using 20 µg of protein, loaded onto a 12%  
1002 acrylamide gel, electrophoresed by SDS-PAGE and then transferred to polyvinylidene fluoride  
1003 membranes (Life Sciences), blocked for 1 h at room temperature in 5% (w/v) semi-skimmed milk,  
1004 and probed overnight at 4°C with the following primary antibodies (diluted in 5% BSA): mouse  
1005 monoclonal anti-VDAC (1:1000; Abcam ab14734), and mouse monoclonal Total OXPHOS  
1006 Cocktail (1:2000, Abcam ab110413). To address the poorer sensitivity to the CIV subunit in this  
1007 cocktail after boiling human samples, we also probed using mouse monoclonal CIV (1:1000,  
1008 Life Technologies A21348). Ponceau staining was performed to normalize protein loading.  
1009 Following washing, membranes were incubated with HRP-conjugated secondary antibodies  
1010 (diluted in 5% milk, Abcam) for 1 h at room temperature. Protein bands were detected using  
1011 SuperSignal™ West Pico Chemiluminescent Substrate (Thermo Scientific, USA) and imaged  
1012 with a G-Box Chem Imaging System. Analysis of protein bands was performed using  
1013 GeneTools software (Syngene, UK).

#### 1014 **4.7 Sample preparation and protein extraction for MS**

1015 Roughly, 5 to 8 mg of vastus lateralis muscle tissue was pulverized in liquid nitrogen and mixed  
1016 with the modified SDT lysis buffer (100 mM Tris, 140 mM NaCl, 4% SDS, 1% Triton X-114, pH  
1017 7.6 (Sigma)) (Wisniewski *et al.*, 2009). Tissues were sonicated using preprogrammed tabletop tip  
1018 sonicator, centrifuged at +4°C for 15 min at 14000 rpm, aliquoted, and stored at -80°C until  
1019 further processing. Protein concentration was determined using a commercially available 2-D  
1020 quant kit (GE Healthcare Life Sciences). The sample quality was confirmed using NuPAGE®  
1021 protein gels stained with fluorescent SyproRuby protein stain (Thermo Fisher). 300 µg of muscle  
1022 tissue lysate was used for tryptic digestion.

1023 Detergents and lipids were removed by standard methanol/chloroform extraction protocol  
1024 (sample:methanol:chloroform:water – 1:4:1:3) (Wessel & Flugge, 1984). Purified proteins were  
1025 resuspended using a small aliquot (30 µl) of concentrated urea buffer (8M Urea, 2M Thiourea,  
1026 150 mM NaCl (Sigma)), reduced with 50 mM DTT for 1 hour at 36°C and alkylated with 100 mM  
1027 iodoacetamide for 1 hour at 36°C in the dark. Concentrated urea was diluted 12 times with 50  
1028 mM ammonium bicarbonate buffer. Proteins were digested for 18 hours at 36°C using  
1029 trypsin/LysC mixture (Promega) in 1:50 (w/w) enzyme to protein ratio. Protein digests were

1030 desalted on 10 x 4.0 mm C18 cartridge using Agilent 1260 Bio-inert HPLC system connected to  
1031 the fraction collector. Purified peptides were speed vacuum dried and stored at -80°C.

1032 Initially, three independent 10-plex tandem mass spectrometry tag (TMT 10-plex) experiments  
1033 were designed. Samples in each TMT experiment were blinded and randomized between TMT  
1034 channels to avoid labeling and sampling bias. Each LC-MS experiment used 100 µg of muscle  
1035 tissue digest from 5 MA samples matched with 5 controls (NA) that were independently labeled  
1036 with 10-plex tags (Thermo Fisher). Of the three 10-plex experiment, a total of 24 biological  
1037 replicates and 6 technical replicates were included, technical replicates were used to optimize  
1038 instrument performane and to estimate technical reproducibility. 200 femtomole of bacterial beta-  
1039 galactosidase digest (SCIEX) was spiked into each sample prior to TMT labeling to control  
1040 labeling efficiency and overall instrument performance. Labeled peptides were combined into  
1041 one experiment and fractionated.

#### 1042 **4.8 High-pH RPLC fractionation and concatenation strategy**

1043 Basic reverse phase fractionation was done on Agilent 1260 bioinert HPLC system as  
1044 previously described (Wang *et al.*, 2011). XBridge 4.6 mm X 250 mm column (Peptide BEH  
1045 C18) equipped with 3.9 mm X 5 mm XBridge BEH Shield RP18 XP VanGuard cartridge  
1046 (Waters). The solvent composition was as follows: 10mM ammonium formate (pH 10) as mobile  
1047 phase (A) and 10mM ammonium formate and 90% ACN (pH 10) as mobile-phase B. Labeled  
1048 peptides were separated using a linear organic gradient (5% to 50% B in 100 min). Initially, 99  
1049 fractions were collected during each LC run at 1 min intervals each. Three fractions separated  
1050 by 33 min intervals were concatenated into 33 master fractions, as previously described  
1051 (Ubaida-Mohien *et al.*, 2019a).

#### 1052 **4.9 nano LC-MS/MS analyses**

1053 Purified peptide fractions from muscle tissues were analyzed using UltiMate 3000 Nano LC  
1054 Systems coupled to the Q Exactive HF mass spectrometer (Thermo Scientific, San Jose, CA).  
1055 Each fraction was separated on a 45 cm capillary column with 150 µm ID on a linear organic  
1056 gradient using 550 nl/min flow rate. Gradient went from 5 to 35 %B in 195 min. Mobile phases A  
1057 and B consisted of 0.1% formic acid in water and 0.1% formic acid in acetonitrile, respectively.  
1058 Tandem mass spectra were obtained using Q Exactive HF mass spectrometer with the heated  
1059 capillary temperature +280°C and spray voltage set to 2.5 kV. Full MS1 spectra were acquired  
1060 from 330 to 1600 m/z at 120000 resolution and 50 ms maximum accumulation time with

1061 automatic gain control [AGC] set to  $3 \times 10^6$ . Dd-MS2 spectra were acquired using dynamic m/z  
1062 range with a fixed first mass of 100 m/z. MS/MS spectra were resolved to 30000 with 150 ms of  
1063 maximum accumulation time and AGC target set to  $1 \times 10^5$ . Fifteen most abundant ions were  
1064 selected for fragmentation using 29% normalized high collision energy. A dynamic exclusion  
1065 time of 70 s was used to discriminate against the previously analyzed ions.

## 1066 **5.0 Proteomics informatics**

1067 The PeptideProphet model fits the peptide-spectrum matches into two distributions, one an  
1068 extreme value distribution for the incorrect matches, and the other a normal distribution for  
1069 correct matches. The protein was filtered at thresholds of 0.01% peptide FDR, 1% protein FDR  
1070 and requiring a minimum of 1 unique peptide for protein identification.

1071 Single peptide hits were allowed when any quantifiable peptide was detected across at least  
1072 30% of all samples ( $n=24$ ) and if proteins were identified with more than one search engine.  
1073 Reporter ion quantitative values were extracted from Scaffold and decoy spectra, contaminant  
1074 spectra and peptide spectra shared between more than one protein were removed. Typically,  
1075 spectra are shared between proteins if the two proteins share most of their sequence, usually  
1076 for protein isoforms. Reporter ions were retained for further analyses if they were exclusive to  
1077 only one protein, and they were identified in all 10 channels across each TMT batch. Further  
1078 protein bioinformatics was performed, as previously described (Ubaida-Mohien *et al.*, 2019a)

## 1079 **Extended Method References**

1080 Adelnia F, Ubaida-Mohien C, Moaddel R, Shardell M, Lyashkov A, Fishbein KW, Aon MA, Spencer RG &  
1081 Ferrucci L. (2020). Proteomic signatures of in vivo muscle oxidative capacity in healthy adults.  
1082 *Aging Cell* **19**, e13124.

1083 Ahn BH, Kim HS, Song S, Lee IH, Liu J, Vassilopoulos A, Deng CX & Finkel T. (2008). A role for the  
1084 mitochondrial deacetylase Sirt3 in regulating energy homeostasis. *Proc Natl Acad Sci U S A* **105**,  
1085 14447-14452.  
1086

1087 Bess AS, Crocker TL, Ryde IT & Meyer JN. (2012). Mitochondrial dynamics and autophagy aid in removal  
1088 of persistent mitochondrial DNA damage in *Caenorhabditis elegans*. *Nucleic Acids Res* **40**, 7916-  
1089 7931.  
1090

1091 Bhadra M, Howell P, Dutta S, Heintz C & Mair WB. (2020). Alternative splicing in aging and longevity.  
1092 *Hum Genet* **139**, 357-369.  
1093

- 1094  
1095 Bindea G, Mlecnik B, Hackl H, Charoentong P, Tosolini M, Kirilovsky A, Fridman WH, Pages F, Trajanoski Z  
1096 & Galon J. (2009). ClueGO: a Cytoscape plug-in to decipher functionally grouped gene ontology  
1097 and pathway annotation networks. *Bioinformatics* **25**, 1091-1093.
- 1098  
1099 Brandauer J, Andersen MA, Kellezi H, Risis S, Frosig C, Vienberg SG & Treebak JT. (2015). AMP-activated  
1100 protein kinase controls exercise training- and AICAR-induced increases in SIRT3 and MnSOD.  
1101 *Front Physiol* **6**, 85.
- 1102  
1103 Bua E, Johnson J, Herbst A, Delong B, McKenzie D, Salamat S & Aiken JM. (2006a). Mitochondrial DNA-  
1104 deletion mutations accumulate intracellularly to detrimental levels in aged human skeletal  
1105 muscle fibers. *American Journal of Human Genetics* **79**, 469-480.
- 1106  
1107 Bua E, Johnson J, Herbst A, Delong B, McKenzie D, Salamat S & Aiken JM. (2006b). Mitochondrial DNA-  
1108 deletion mutations accumulate intracellularly to detrimental levels in aged human skeletal  
1109 muscle fibers. *Am J HumGenet* **79**, 469-480.
- 1110  
1111 Burke SK, Solania A, Wolan DW, Cohen MS, Ryan TE & Hepple RT. (2021). Mitochondrial permeability  
1112 transition causes mitochondrial reactive oxygen species- and caspase 3-dependent atrophy of  
1113 single adult mouse skeletal muscle fibers. *Cells* **10**, 2586.
- 1114  
1115 Cawthon PM, Trivison TG, Manini TM, Patel S, Pencina KM, Fielding RA, Magaziner JM, Newman AB,  
1116 Brown T, Kiel DP, Cummings SR, Shardel M, Guralnik J, Woodhouse LJ, Pahor M, Binder E,  
1117 D'Agostino RB, Xue QL, Orwoll E, Landi F, Orwig D, Schaap L, Latham NN, Hirani V, Kwok T,  
1118 Pereira S, Rooks D, Kashiwa M, Torres-Gonzalez M, Menetski JP, Correa-De-Araujo R, Bhasin S,  
1119 Sarcopenia D & Outcomes Consortium Conference p. (2019). Establishing the Link Between Lean  
1120 Mass and Grip Strength Cut-points With Mobility Disability and Other Health Outcomes:  
1121 Proceedings of the Sarcopenia Definition and Outcomes Consortium Conference. *J Gerontol A*  
1122 *Biol Sci Med Sci*.
- 1123  
1124 Cho Y, Hazen BC, Gandra PG, Ward SR, Schenk S, Russell AP & Kralli A. (2016). Perm1 enhances  
1125 mitochondrial biogenesis, oxidative capacity, and fatigue resistance in adult skeletal muscle.  
1126 *FASEB J* **30**, 674-687.
- 1127  
1128 Cimen H, Han MJ, Yang Y, Tong Q, Koc H & Koc EC. (2010). Regulation of succinate dehydrogenase  
1129 activity by SIRT3 in mammalian mitochondria. *Biochemistry* **49**, 304-311.
- 1130  
1131 Cogliati S, Frezza C, Soriano ME, Varanita T, Quintana-Cabrera R, Corrado M, Cipolat S, Costa V, Casarin  
1132 A, Gomes LC, Perales-Clemente E, Salviati L, Fernandez-Silva P, Enriquez JA & Scorrano L. (2013).  
1133 Mitochondrial cristae shape determines respiratory chain supercomplexes assembly and  
1134 respiratory efficiency. *Cell* **155**, 160-171.



- 1135  
1136 Deschenes M & Chabot B. (2017). The emerging role of alternative splicing in senescence and aging.  
1137 *Aging Cell* **16**, 918-933.
- 1138  
1139 Dulac M, Leduc-Gaudet JP, Reynaud O, Ayoub MB, Guerin A, Finkelchtein M, Hussain SN & Gouspillou G.  
1140 (2020). Drp1 knockdown induces severe muscle atrophy and remodelling, mitochondrial  
1141 dysfunction, autophagy impairment and denervation. *J Physiol* **598**, 3691-3710.
- 1142  
1143 Gao L, Kumar V, Vellichirammal NN, Park SY, Rudebush TL, Yu L, Son WM, Pekas EJ, Wafi AM, Hong J,  
1144 Xiao P, Guda C, Wang HJ, Schultz HD & Zucker IH. (2020). Functional, proteomic and  
1145 bioinformatic analyses of Nrf2- and Keap1- null skeletal muscle. *J Physiol*.
- 1146  
1147 Goodpaster BH, Park SW, Harris TB, Kritchevsky SB, Nevitt M, Schwartz AV, Simonsick EM, Tylavsky FA,  
1148 Visser M & Newman AB. (2006). The loss of skeletal muscle strength, mass, and quality in older  
1149 adults: the health, aging and body composition study. *J Gerontol A Biol Sci Med Sci* **61**, 1059-  
1150 1064.
- 1151  
1152 Gram M, Vigelso A, Yokota T, Helge JW, Dela F & Hey-Mogensen M. (2015). Skeletal muscle  
1153 mitochondrial H<sub>2</sub>O<sub>2</sub> emission increases with immobilization and decreases after aerobic  
1154 training in young and older men. *J Physiol* **593**, 4011-4027.
- 1155  
1156 Greaves LC, Yu-Wai-Man P, Blakely EL, Krishnan KJ, Beadle NE, Kerin J, Barron MJ, Griffiths PG, Dickinson  
1157 AJ, Turnbull DM & Taylor RW. (2010). Mitochondrial DNA defects and selective extraocular  
1158 muscle involvement in CPEO. *Investigative ophthalmology & visual science* **51**, 3340-3346.
- 1159  
1160 Hafner AV, Dai J, Gomes AP, Xiao CY, Palmeira CM, Rosenzweig A & Sinclair DA. (2010). Regulation of the  
1161 mPTP by SIRT3-mediated deacetylation of CypD at lysine 166 suppresses age-related cardiac  
1162 hypertrophy. *Aging* **2**, 914-923.
- 1163  
1164 Harries LW, Hernandez D, Henley W, Wood AR, Holly AC, Bradley-Smith RM, Yaghootkar H, Dutta A,  
1165 Murray A, Frayling TM, Guralnik JM, Bandinelli S, Singleton A, Ferrucci L & Melzer D. (2011).  
1166 Human aging is characterized by focused changes in gene expression and deregulation of  
1167 alternative splicing. *Aging Cell* **10**, 868-878.
- 1168  
1169 Hepple RT. (2016). Impact of aging on mitochondrial function in cardiac and skeletal muscle. *Free Radic*  
1170 *Biol Med* **98**, 177-186.
- 1171  
1172 Herbrich SM, Cole RN, West KP, Jr., Schulze K, Yager JD, Groopman JD, Christian P, Wu L, O'Meally RN,  
1173 May DH, McIntosh MW & Ruczinski I. (2013). Statistical inference from multiple iTRAQ  
1174 experiments without using common reference standards. *J Proteome Res* **12**, 594-604.

- 1175  
1176 Hinkley JM, Cornnell HH, Standley RA, Chen EY, Narain NR, Greenwood BP, Bussberg V, Tolstikov VV,  
1177 Kiebish MA, Yi F, Vega RB, Goodpaster BH & Coen PM. (2020). Older adults with sarcopenia have  
1178 distinct skeletal muscle phosphodiester, phosphocreatine, and phospholipid profiles. *Aging Cell*  
1179 **19**, e13135.
- 1180  
1181 Holly AC, Melzer D, Pilling LC, Fellows AC, Tanaka T, Ferrucci L & Harries LW. (2013). Changes in splicing  
1182 factor expression are associated with advancing age in man. *Mech Ageing Dev* **134**, 356-366.
- 1183  
1184 Hood DA, Memme JM, Oliveira AN & Triolo M. (2019). Maintenance of Skeletal Muscle Mitochondria in  
1185 Health, Exercise, and Aging. *Annu Rev Physiol* **81**, 19-41.
- 1186  
1187 Huynen MA, Muhlmeister M, Gotthardt K, Guerrero-Castillo S & Brandt U. (2016). Evolution and  
1188 structural organization of the mitochondrial contact site (MICOS) complex and the  
1189 mitochondrial intermembrane space bridging (MIB) complex. *Biochim Biophys Acta* **1863**, 91-  
1190 101.
- 1191  
1192 John GB, Shang Y, Li L, Renken C, Mannella CA, Selker JM, Rangell L, Bennett MJ & Zha J. (2005). The  
1193 mitochondrial inner membrane protein mitofilin controls cristae morphology. *Mol Biol Cell* **16**,  
1194 1543-1554.
- 1195  
1196 Kammers K, Cole RN, Tiengwe C & Ruczinski I. (2015). Detecting Significant Changes in Protein  
1197 Abundance. *EuPA Open Proteom* **7**, 11-19.
- 1198  
1199 Kleinert M, Parker BL, Jensen TE, Raun SH, Pham P, Han X, James DE, Richter EA & Sylow L. (2018).  
1200 Quantitative proteomic characterization of cellular pathways associated with altered insulin  
1201 sensitivity in skeletal muscle following high-fat diet feeding and exercise training. *Scientific*  
1202 *reports* **8**, 10723.
- 1203  
1204 Koltai E, Bori Z, Osvath P, Ihasz F, Peter S, Toth G, Degens H, Rittweger J, Boldogh I & Radak Z. (2018).  
1205 Master athletes have higher miR-7, SIRT3 and SOD2 expression in skeletal muscle than age-  
1206 matched sedentary controls. *Redox biology* **19**, 46-51.
- 1207  
1208 Lindenboim L, Zohar H, Worman HJ & Stein R. (2020). The nuclear envelope: target and mediator of the  
1209 apoptotic process. *Cell Death Discov* **6**, 29.
- 1210  
1211 Mishra P, Carelli V, Manfredi G & Chan DC. (2014). Proteolytic cleavage of Opa1 stimulates  
1212 mitochondrial inner membrane fusion and couples fusion to oxidative phosphorylation. *Cell*  
1213 *Metab* **19**, 630-641.
- 1214

- 1215 Mounier R, Theret M, Lantier L, Foretz M & Viollet B. (2015). Expanding roles for AMPK in skeletal  
1216 muscle plasticity. *Trends Endocrinol Metab* **26**, 275-286.
- 1217
- 1218 Mueller EE, Mayr JA, Zimmermann FA, Feichtinger RG, Stanger O, Sperl W & Kofler B. (2012). Reduction  
1219 of nuclear encoded enzymes of mitochondrial energy metabolism in cells devoid of  
1220 mitochondrial DNA. *Biochemical and biophysical research communications* **417**, 1052-1057.
- 1221
- 1222 Muller-Hocker J, Seibel P, Schneiderbanger K & Kadenbach B. (1993). Different in situ hybridization  
1223 patterns of mitochondrial DNA in cytochrome c oxidase-deficient extraocular muscle fibres in  
1224 the elderly. *Virchows ArchA PatholAnatHistopathol* **422**, 7-15.
- 1225
- 1226 Murphy JL, Ratnaik TE, Shang E, Falkous G, Blakely EL, Alston CL, Taivassalo T, Haller RG, Taylor RW &  
1227 Turnbull DM. (2012a). Cytochrome c oxidase-intermediate fibres: importance in understanding  
1228 the pathogenesis and treatment of mitochondrial myopathy. *Neuromuscul Disord* **22**, 690-698.
- 1229
- 1230 Murphy JL, Ratnaik TE, Shang E, Falkous G, Blakely EL, Alston CL, Taivassalo T, Haller RG, Taylor RW &  
1231 Turnbull DM. (2012b). Cytochrome c oxidase-intermediate fibres: Importance in understanding  
1232 the pathogenesis and treatment of mitochondrial myopathy. *Neuromuscular Disorders* **22**, 690-  
1233 698.
- 1234
- 1235 Nilsson MI & Tarnopolsky MA. (2019). Mitochondria and Aging-The Role of Exercise as a  
1236 Countermeasure. *Biology (Basel)* **8**.
- 1237
- 1238 Old SL & Johnson MA. (1989). Methods of microphotometric assay of succinate dehydrogenase and  
1239 cytochrome c oxidase activities for use on human skeletal muscle. *Histochem J* **21**, 545-555.
- 1240
- 1241 Ott C, Ross K, Straub S, Thiede B, Gotz M, Goosmann C, Krischke M, Mueller MJ, Krohne G, Rudel T &  
1242 Kozjak-Pavlovic V. (2012). Sam50 functions in mitochondrial intermembrane space bridging and  
1243 biogenesis of respiratory complexes. *Mol Cell Biol* **32**, 1173-1188.
- 1244
- 1245 Pereira CA, Carlos D, Ferreira NS, Silva JF, Zanotto CZ, Zamboni DS, Garcia VD, Ventura DF, Silva JS &  
1246 Tostes RC. (2019). Mitochondrial DNA Promotes NLRP3 Inflammasome Activation and  
1247 Contributes to Endothelial Dysfunction and Inflammation in Type 1 Diabetes. *Front Physiol* **10**,  
1248 1557.
- 1249
- 1250 Power GA, Allen MD, Gilmore KJ, Stashuk DW, Doherty TJ, Hepple RT, Taivassalo T & Rice CL. (2016).  
1251 Motor unit number and transmission stability in octogenarian world class athletes: Can age-  
1252 related deficits be outrun? *J Appl Physiol (1985)* **121**, 1013-1020.
- 1253

- 1254 Qi Y, Kapterian TS, Du X, Ma Q, Fei W, Zhang Y, Huang X, Dawes IW & Yang H. (2016). CDP-diacylglycerol  
1255 synthases regulate the growth of lipid droplets and adipocyte development. *J Lipid Res* **57**, 767-  
1256 780.
- 1257  
1258 Rodriguez SA, Grochova D, McKenna T, Borate B, Trivedi NS, Erdos MR & Eriksson M. (2016). Global  
1259 genome splicing analysis reveals an increased number of alternatively spliced genes with aging.  
1260 *Aging Cell* **15**, 267-278.
- 1261  
1262 Sonjak V, Jacob K, Morais JA, Rivera-Zengotita M, Spendiff S, Spake C, Taivassalo T, Chevalier S & Hepple  
1263 RT. (2019). Fidelity of muscle fibre reinnervation modulates ageing muscle impact in elderly  
1264 women. *J Physiol* **597**, 5009-5023.
- 1265  
1266 Spendiff S, Reza M, Murphy JL, Gorman G, Blakely EL, Taylor RW, Horvath R, Campbell G, Newman J,  
1267 Lochmuller H & Turnbull DM. (2013). Mitochondrial DNA deletions in muscle satellite cells:  
1268 implications for therapies. *Hum Mol Genet* **22**, 4739-4747.
- 1269  
1270 Spendiff S, Vuda M, Gouspillou G, Aare S, Perez A, Morais JA, Jagoe RT, Filion ME, Glicksman R,  
1271 Kapchinsky S, MacMillan NJ, Pion CH, Aubertin-Leheudre M, Hettwer S, Correa JA, Taivassalo T &  
1272 Hepple RT. (2016). Denervation drives mitochondrial dysfunction in skeletal muscle of  
1273 octogenarians. *J Physiol* **594**, 7361-7379.
- 1274  
1275 Stewart M. (2019). Polyadenylation and nuclear export of mRNAs. *J Biol Chem* **294**, 2977-2987.
- 1276  
1277 Strambio-De-Castillia C, Niepel M & Rout MP. (2010). The nuclear pore complex: bridging nuclear  
1278 transport and gene regulation. *Nat Rev Mol Cell Biol* **11**, 490-501.
- 1279  
1280 Szklarczyk D, Gable AL, Lyon D, Junge A, Wyder S, Huerta-Cepas J, Simonovic M, Doncheva NT, Morris JH,  
1281 Bork P, Jensen LJ & Mering CV. (2019). STRING v11: protein-protein association networks with  
1282 increased coverage, supporting functional discovery in genome-wide experimental datasets.  
1283 *Nucleic Acids Res* **47**, D607-D613.
- 1284  
1285 Tao R, Coleman MC, Pennington JD, Ozden O, Park SH, Jiang H, Kim HS, Flynn CR, Hill S, Hayes McDonald  
1286 W, Olivier AK, Spitz DR & Gius D. (2010). Sirt3-mediated deacetylation of evolutionarily  
1287 conserved lysine 122 regulates MnSOD activity in response to stress. *Mol Cell* **40**, 893-904.
- 1288  
1289 Taylor RW, Barron MJ, Borthwick GM, Gospel A, Chinnery PF, Samuels DC, Taylor GA, Plusa SM,  
1290 Needham SJ, Greaves LC, Kirkwood TB & Turnbull DM. (2003). Mitochondrial DNA mutations in  
1291 human colonic crypt stem cells. *Journal of Clinical Investigation* **112**, 1351-1360.
- 1292

1293 Tezze C, Romanello V, Desbats MA, Fadini GP, Albiero M, Favaro G, Ciciliot S, Soriano ME, Morbidoni V,  
1294 Cerqua C, Loeffler S, Kern H, Franceschi C, Salvioli S, Conte M, Blaauw B, Zampieri S, Salviati L,  
1295 Scorrano L & Sandri M. (2017). Age-Associated Loss of OPA1 in Muscle Impacts Muscle Mass,  
1296 Metabolic Homeostasis, Systemic Inflammation, and Epithelial Senescence. *Cell Metab* **25**, 1374-  
1297 1389 e1376.

1298  
1299 Ubaida-Mohien C, Gonzalez-Freire M, Lyashkov A, Moaddel R, Chia CW, Simonsick EM, Sen R & Ferrucci  
1300 L. (2019a). Physical Activity Associated Proteomics of Skeletal Muscle: Being Physically Active in  
1301 Daily Life May Protect Skeletal Muscle From Aging. *Front Physiol* **10**, 312.

1302  
1303 Ubaida-Mohien C, Lyashkov A, Gonzalez-Freire M, Tharakan R, Shardell M, Moaddel R, Semba RD, Chia  
1304 CW, Gorospe M, Sen R & Ferrucci L. (2019b). Discovery proteomics in aging human skeletal  
1305 muscle finds change in spliceosome, immunity, proteostasis and mitochondria. *Elife* **8**.

1306  
1307 Wang Y, Yang F, Gritsenko MA, Wang Y, Clauss T, Liu T, Shen Y, Monroe ME, Lopez-Ferrer D, Reno T,  
1308 Moore RJ, Klemke RL, Camp DG, 2nd & Smith RD. (2011). Reversed-phase chromatography with  
1309 multiple fraction concatenation strategy for proteome profiling of human MCF10A cells.  
1310 *Proteomics* **11**, 2019-2026.

1311  
1312 Wentz SR & Rout MP. (2010). The nuclear pore complex and nuclear transport. *Cold Spring Harb*  
1313 *Perspect Biol* **2**, a000562.

1314  
1315 Wessel D & Flugge UI. (1984). A method for the quantitative recovery of protein in dilute solution in the  
1316 presence of detergents and lipids. *Anal Biochem* **138**, 141-143.

1317  
1318 Wisniewski JR, Zougman A, Nagaraj N & Mann M. (2009). Universal sample preparation method for  
1319 proteome analysis. *Nat Methods* **6**, 359-362.

1320  
1321  
1322  
1323  
1324  
1325  
1326  
1327

# Supplemental Tables & Figures

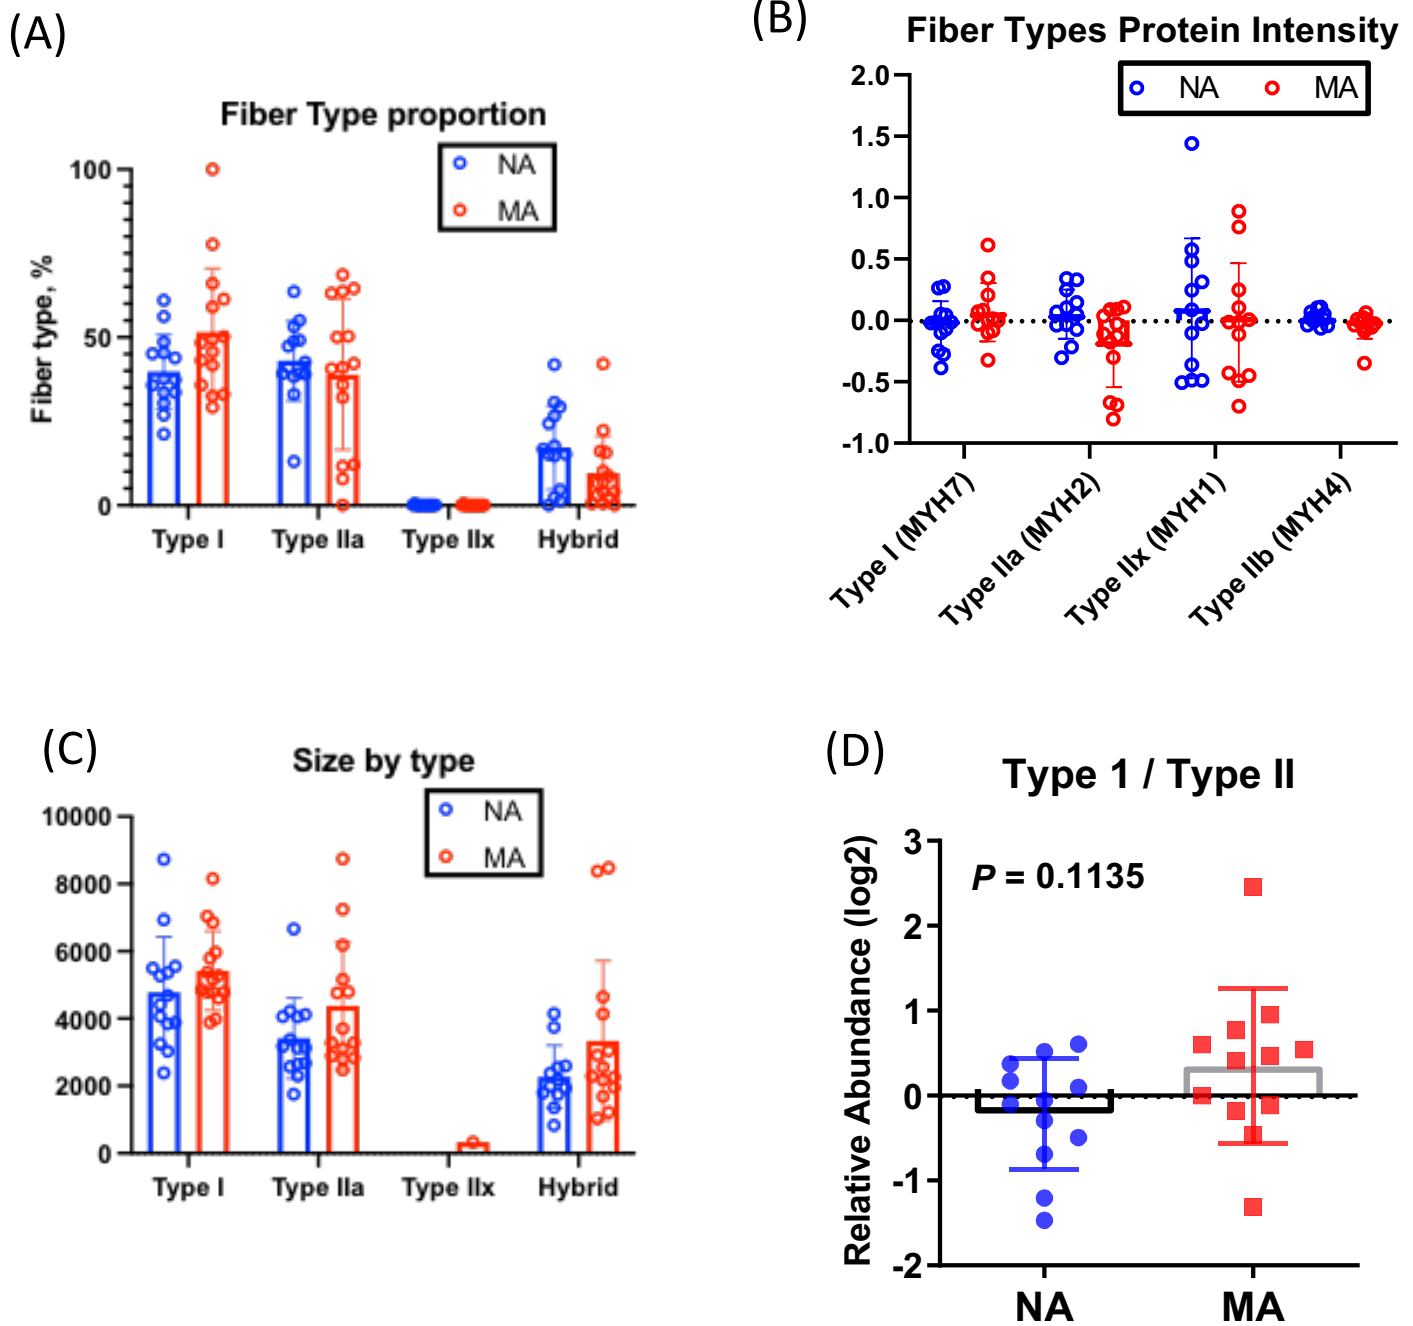

**Figure 1-figure supplement 1. (A) Fiber type quantification.** Fiber type proportion is quantified using immunofluorescence labelling in NA and MA subjects (left). **(B)** Myosin isoform quantification from the proteomics results from the same subjects (top right), and the ratio of type1 and type 2 fibers (bottom right). **(C)** Fiber size by type and **(D)** type I to type II fiber cross-sectional area ratio from immunolabeled muscle cross-sections.

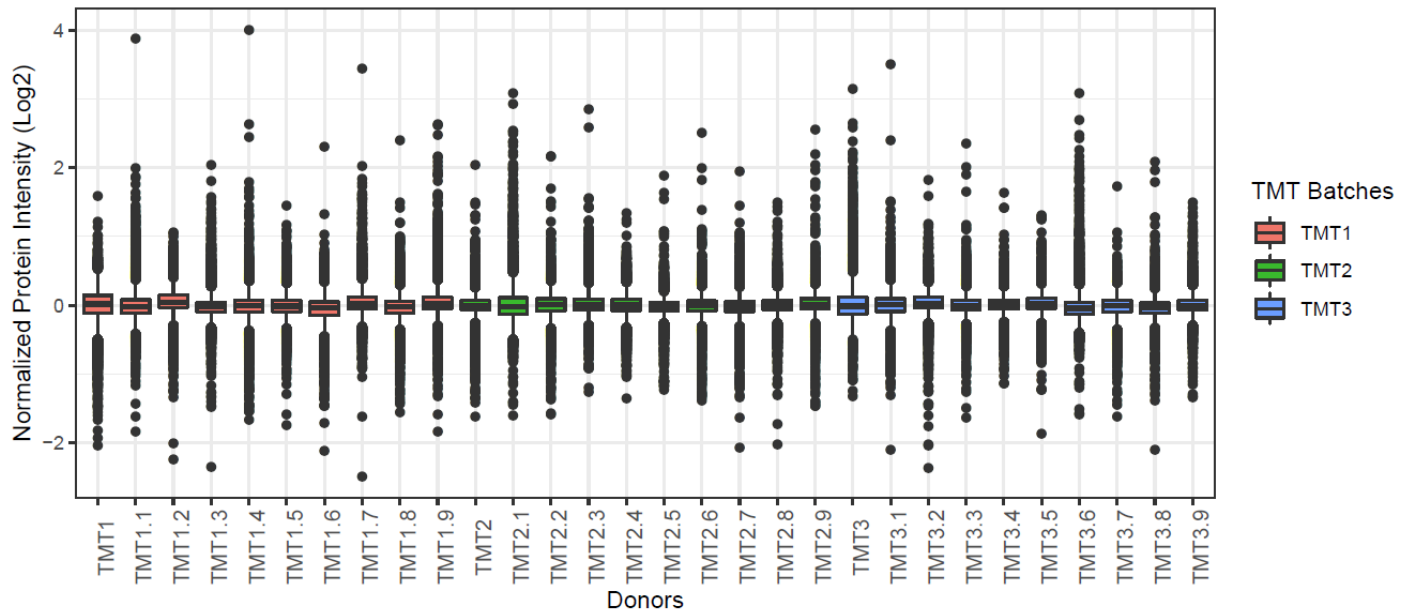

**Figure 2-figure supplement 1.** Boxplot of all donors from 3 TMT batches. X-axis shows all the donors including repeats and y-axis shows the median normalized log2 protein intensity. Each batch is color coded.



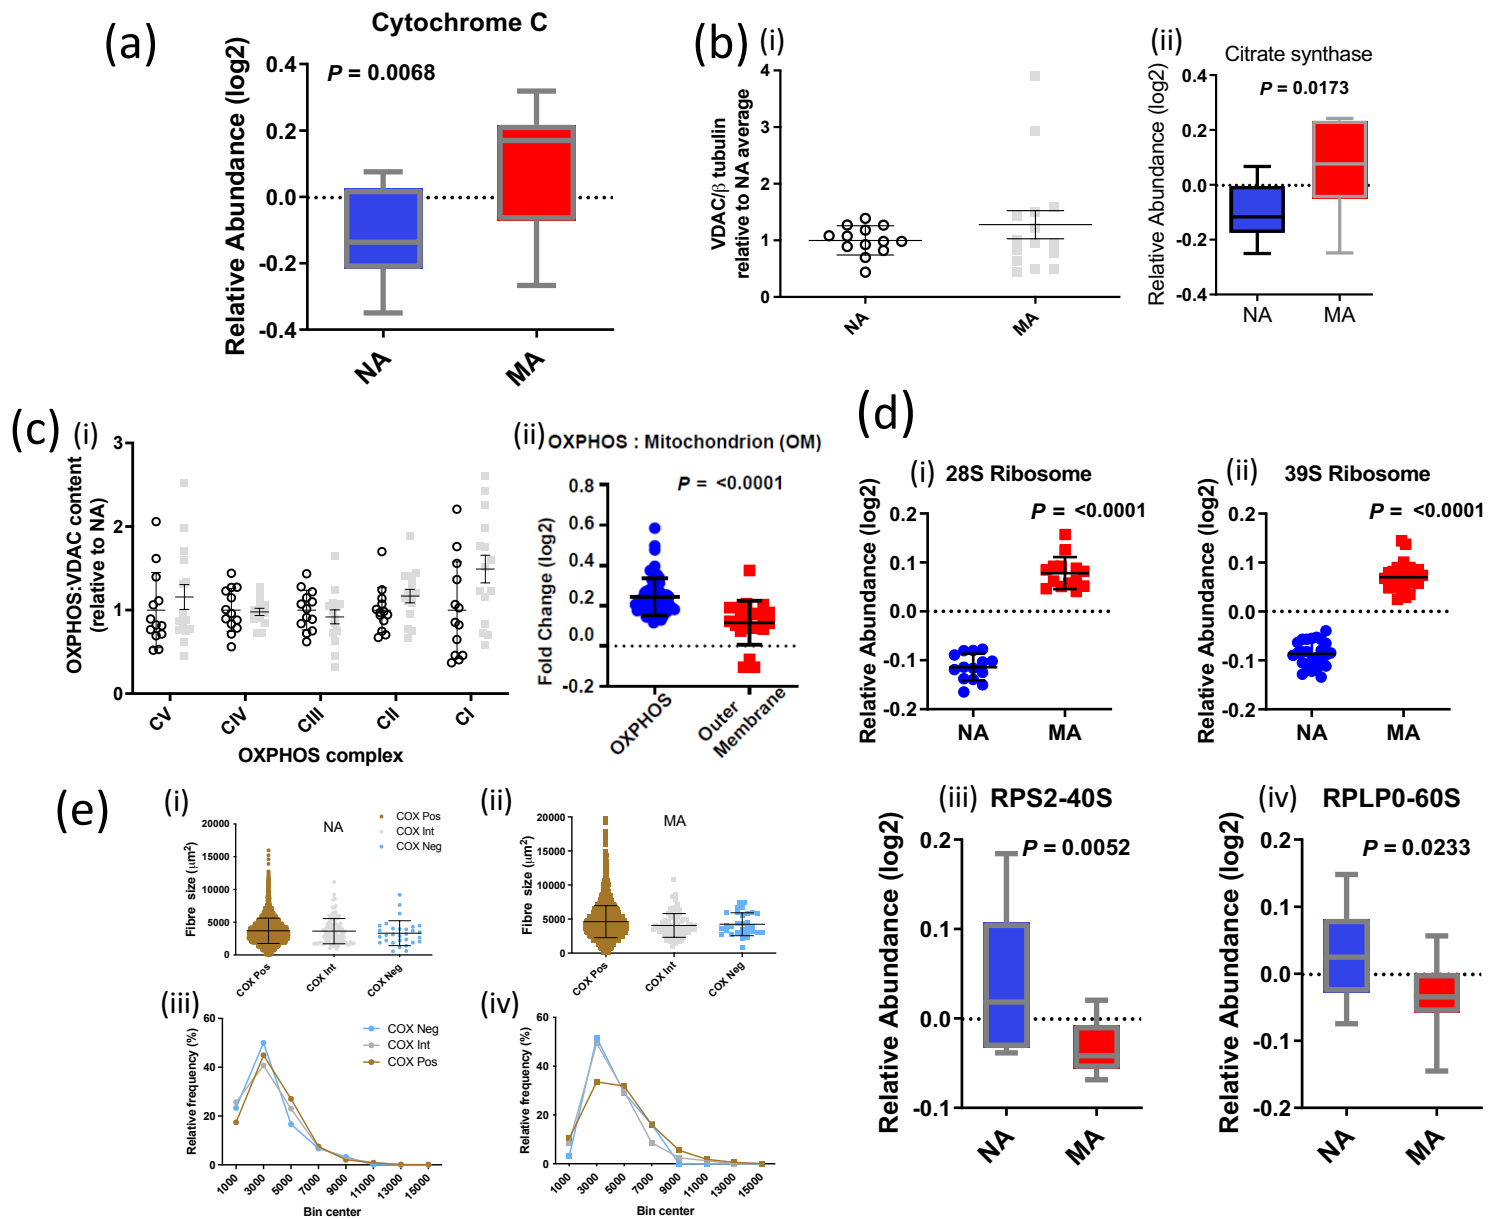

**Figure 3-figure supplement 1.** Abundance of mitochondrial proteins, VDAC and subunits of the OXPPOS chain assessed by western blot and MS in MA versus NA. (a) Higher abundance of cytochrome C in MA. (b) Abundance of mitochondrial proteins. (i) There was no significant difference in VDAC assessed by Western blot between MA (n=15) and NA (n=13, insufficient tissue from one subject). Removal of the MA outlier made no difference to significance values (Wilcoxon rank-sum). (ii) Citrate synthase protein content by proteomics was higher in MA. (c) (i) There was a significant main effect ( $p=0.046$ ) indicating higher OXPPOS complexes relative to VDAC in MA (grey squares). Western blot values are expressed relative to NA average (empty circles). Graphs show means and standard deviations. (ii) Consistent with these Western blot analyses, Log<sub>2</sub> FC expression of 64 significant OXPPOS complex proteins versus 21 VDAC proteins was higher in MA than NA. (d) Ribosomal proteins. Mitochondrial ribosomes are overrepresented in MA and cytoplasmic ribosomes are underrepresented in MA. (i) Twelve 28S ribosomal proteins were averaged and (ii) twenty-four 39S ribosomes are averaged and shown, respectively. (iii) 40S ribosomal protein RPS2 is significantly lower in MA versus NA, and similarly (ii) the abundance of RPLP0 60S protein was higher in MA. (e) Size distribution of respiratory chain compromised fibres: range of observations in (i) NA and (ii) MA, along with the frequency distributions in (iii) NA and (iv) MA. There was no significant difference in the average fibre size between COX<sup>Pos</sup>, COX<sup>Int</sup>, or COX<sup>Neg</sup> cells in either NA or MA subjects and there was no significant increase in the frequency of COX<sup>Neg</sup> cells in the smallest size bin. Circles are NA and squares are MA, brown symbols are COX<sup>Pos</sup> fibres, grey symbols are COX<sup>Int</sup> fibres, blue symbols are COX<sup>Neg</sup> fibres. Graphs show means and standard deviation.

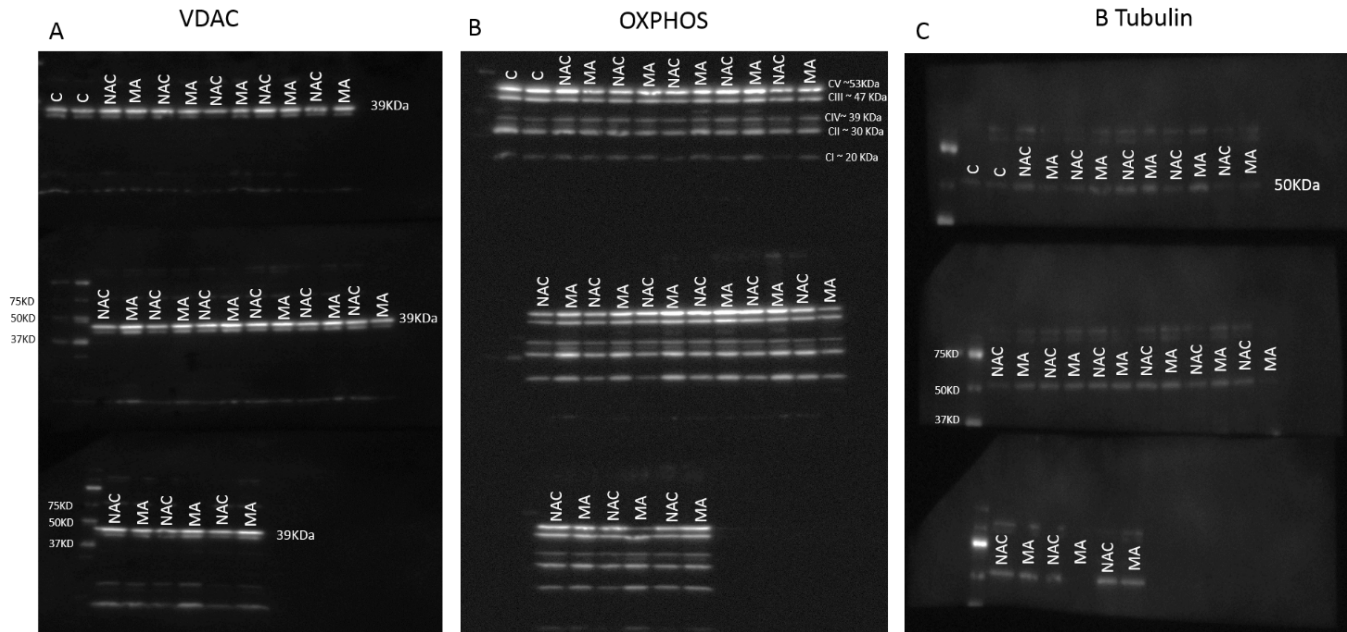

**Figure 3-figure supplement 2. Mitochondrial protein quantification.** Mitochondrial protein quantification was performed by immunoblotting of the mitochondrial proteins VDAC (**A**) and the components of the OXPHOS system (**B**). The samples were loaded alternatively i.e. one MA and one NA. Gels held 12 samples plus a pre stained protein standard (161-0375 BioRad). Quantification was performed on images taken with all three gels present. The gels were probed for tubulin (**C**), stripped, then probed for VDAC, stripped again and then probed for the OXPHOS subunits. C = samples of protein from subjects not included in this study.

(a)

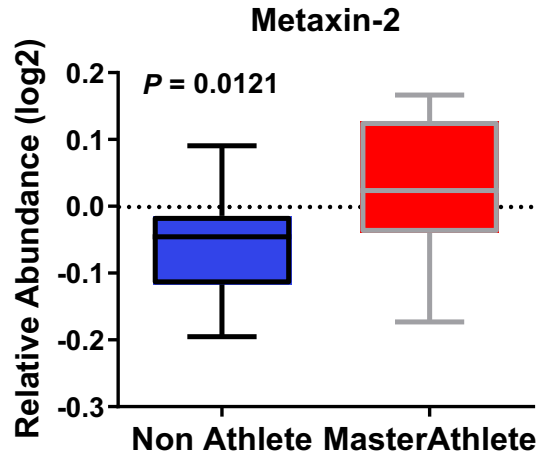

(b)

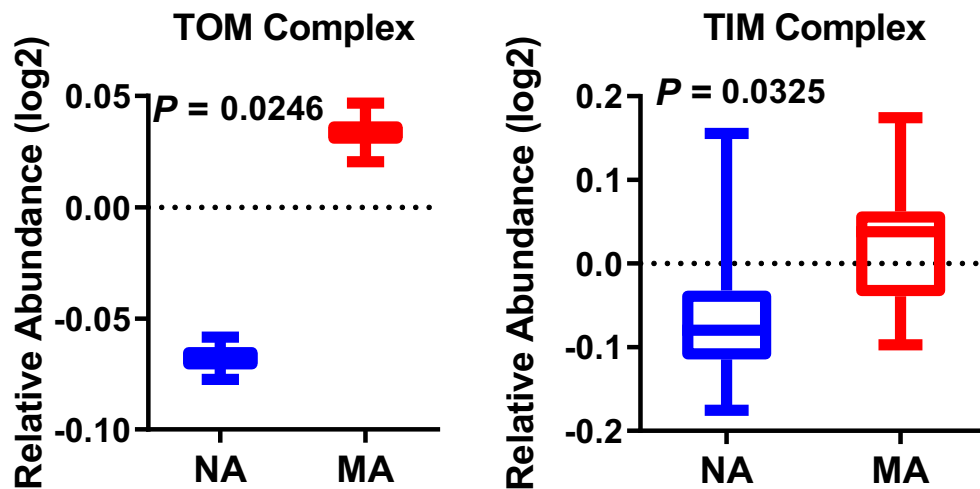

**Figure 3-figure supplement 3.** mtDNA enrichment analysis and cristae formation. (a) Relative protein abundance of metaxin. (b) TOM complex and TIM complex. The average expression of all the proteins quantified for TOM complex (TOM22 and TOMM40) and 9 TIM complex proteins are on bottom figure panel.

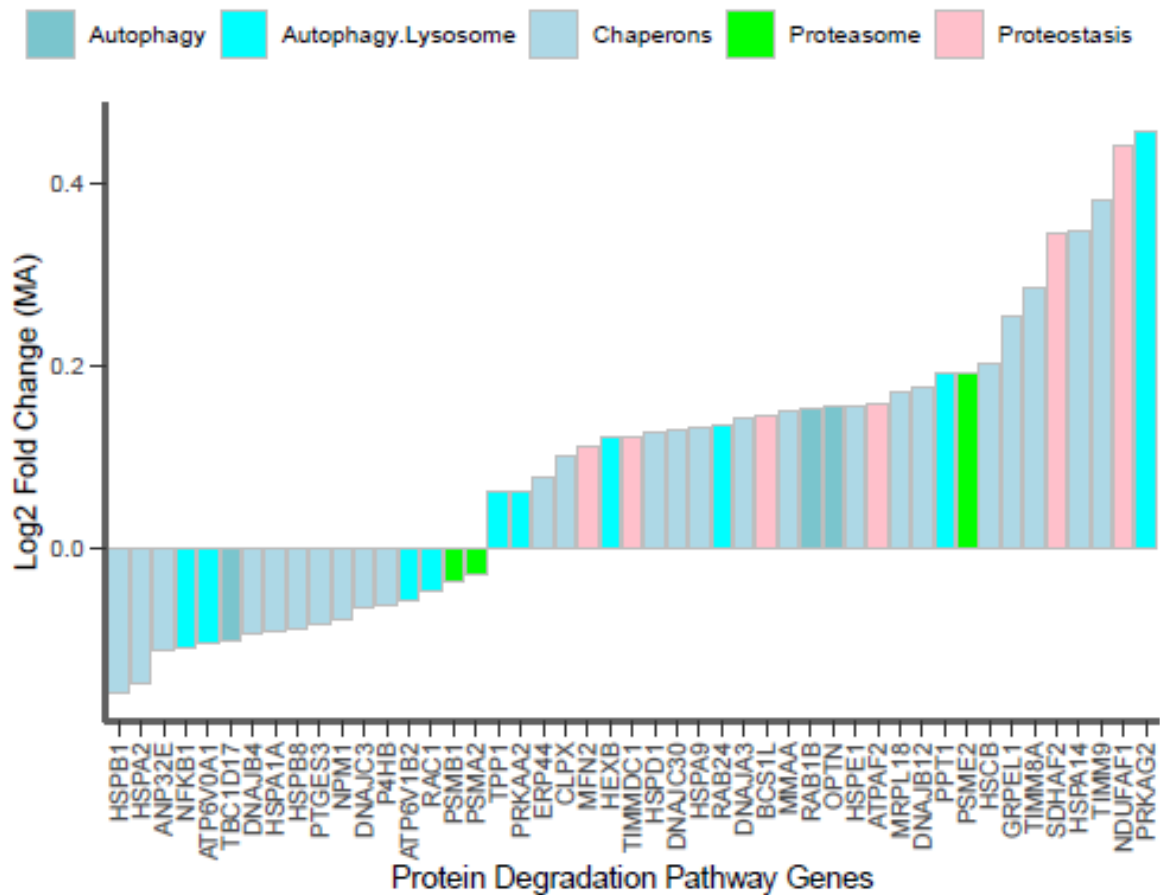

**Figure 3-figure supplement 4:** Autophagy lysosomal system, and ubiquitin proteasome pathway proteins. Expression of significant proteins from autophagy and proteasome pathways are shown for MA vs NA. Each bar is a protein with the corresponding gene name showing decrease in abundance to increase in abundance (left to right). X-axis is the protein, and Y-axis is the log2 FC of the MA proteins. Different categories of the autophagy, proteostasis proteins are color coded.

(a)

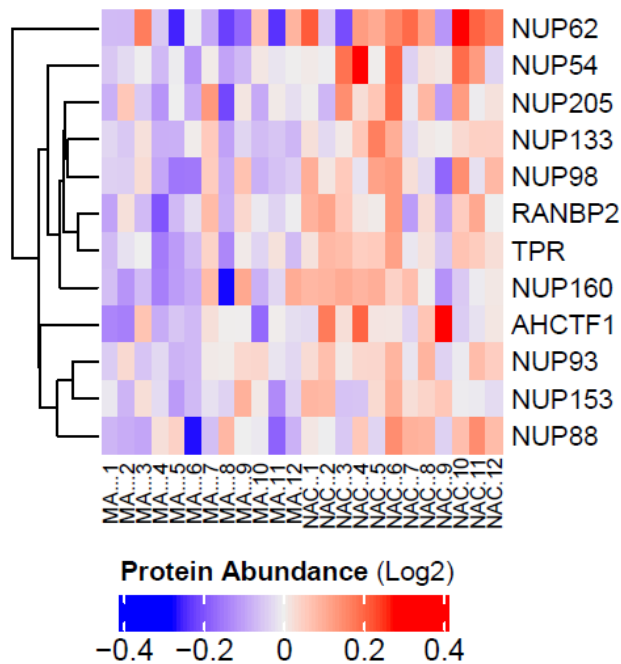

(b)

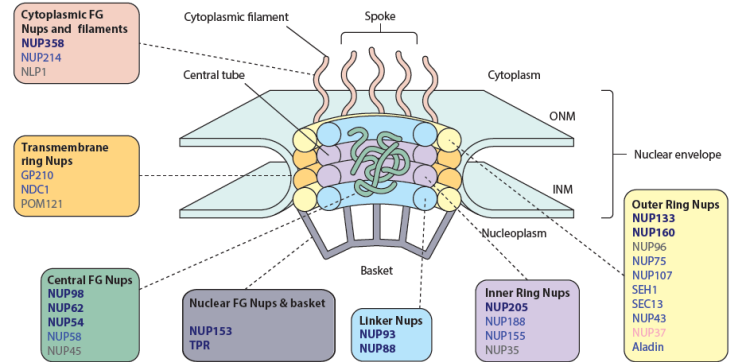

**Figure 3-figure supplement 5:** (a) Nuclear pore membrane proteins. Expression of significant nuclear pore proteins for all donors. The first 12 columns are MA donors followed by NA, The abundance of protein expression is lower in MA versus NA. (b) Underrepresented MA proteins in the nuclear pore structure. Structure of nuclear pore complex (NPC) and the proteins underrepresented showing significant protein coverage for all classes of NPC. Bold blue gene names are significant underrepresented proteins ( $p < 0.05$ ), blue gene names are quantified but not significant ( $p > 0.05$ ) and gray gene names are not detected in the dataset.

**A**

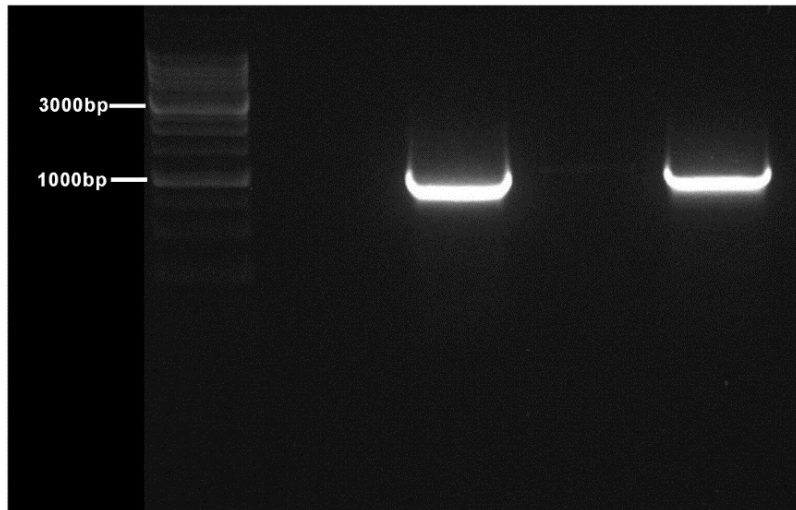

**B**

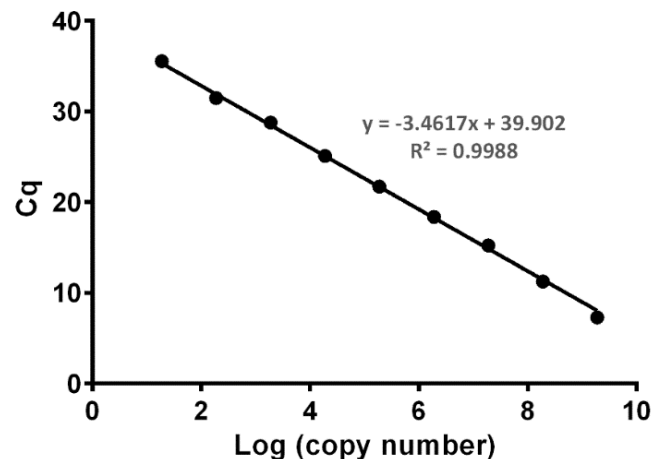

**Figure 3-figure supplement 6. Generating a standard curve in order to determine absolute mtDNA copy number.** A 1011bp fragment (**A**) containing the MTND1 region was amplified and then run (both visible lanes) with a 25K ladder (Diamed). Following separation on a 1% gel the band was extracted using a QIAquick Gel Extraction Kit (Qiagen) and the product quantified using a spectrophotometer. (**B**) The mtDNA fragment was then serially diluted down to generate a standard curve which was then run on a *MTND1* TaqMan® qPCR assay multiple times to generate a consistent line and equation. All subject samples were run at the same time along with the curve in order that their mtDNA copy number could be determined.

| <b>Age Group</b>                | <b>20-34</b>  | <b>35-49</b>  | <b>50-64</b>  | <b>65-79</b>  | <b>80+</b>    | <b>P-value</b>  | <b>R<sup>2</sup></b> |
|---------------------------------|---------------|---------------|---------------|---------------|---------------|-----------------|----------------------|
|                                 | (n=13)        | (n=11)        | (n=12)        | (n=12)        | (n=10)        | --              | --                   |
| <b>Gender</b>                   | <i>M8, F5</i> | <i>M7, F4</i> | <i>M7, F5</i> | <i>M8, F4</i> | <i>M6, F4</i> | --              | --                   |
| <b>Age (yr)</b>                 | 27.2 ± 3.3    | 41.3 ± 4.5    | 57.1 ± 4.7    | 70.3 ± 2.3    | 82.4 ± 2.4    | --              | --                   |
| <b>Race</b>                     | 9C, 2AA, 2A   | 5C, 6AA       | 8C, 4AA       | 10C, 1AA, 1A  | 9C, 1AA       | 0.0958          | --                   |
| <b>*BMI, kg/m<sup>2</sup></b>   | 25.9 ± 2.8    | 26.4 ± 2.6    | 26.6 ± 3.2    | 26.4 ± 2.4    | 25.2 ± 3.9    | 0.3458          | 0.007                |
| <b>Height (cm)</b>              | 172 ± 11      | 177 ± 10      | 169 ± 4       | 172 ± 11      | 172 ± 6       | 0.3985          | --                   |
| <b>*Weight (kg)</b>             | 76 ± 10       | 81 ± 9        | 77 ± 12       | 75 ± 13       | 73 ± 16       | <b>1.74E-05</b> | 0.34                 |
| <b>Education (yr)</b>           | 16 ± 3        | 14 ± 3        | 14 ± 2        | 16 ± 2        | 17 ± 2        | 0.3305          | --                   |
| <b>*Waist Circumference(cm)</b> | 82 ± 7        | 87 ± 7        | 90 ± 11       | 92 ± 11       | 92 ± 13       | <b>6.32E-06</b> | 0.39                 |
| <b>*KEIS (left) ±</b>           | 192 ± 31      | 208 ± 55      | 200 ± 71      | 165 ± 62      | 130 ± 42      | <b>4.29E-07</b> | 0.40                 |
| <b>*KEIS (right) ±</b>          | 194 ± 38      | 220 ± 65      | 194 ± 78      | 169 ± 53      | 147 ± 57      | <b>2.41E-07</b> | 0.41                 |
| <b>†Physical Activity</b>       | 1.8 ± 1.4     | 1.8 ± 1.3     | 2 ± 1.1       | 2.3 ± 1       | 1.5 ± 1.1     | 0.5145          | --                   |

**Figure 5–figure supplement 1. Baseline characteristics of the GESTALT skeletal muscle**

**participants.** The participants are classified into 5 different age groups. Gender: The number of donors is represented in numeric, *M* is Male, *F* is Female. Age in years as mean and standard deviation (SD ±) for each age group. Race: number of donors is shown in left and race is shown in italics, *C* is Caucasian, *AA* is African American, and *A* is Asian. Body Mass Index (BMI) expressed as mean and SD (±) for each group. *P*-value is calculated by 1-way ANOVA with Kruskal-Wallis test.

\**P*-value calculated from linear regression model, gender adjusted.

± Knee Extension Isokinetic Strength (KEIS) (30°/sec; Nm).

†Physical activity is calculated from the sum of weight circuit, vigorous exercise, brisk walking and casual walking and summed as high intensity physical activity per week. This is further categorized into 0 (not active), 1 (moderately active), 2 (active), and 3 (highly active) and expressed as mean of categorical variables (0,1,2,3) ± SD.
